# Supplementary material
Source: PubMed Central journal article supplement (PMC4959966)
Supplement: NIHMS779442-supplement-01.pdf [file NIHMS779442-supplement-01.pdf]

# Four Susceptibility Loci for Gallstone Disease Identified in a Meta-analysis of Genome-wide Association Studies

## Short title: GWAS meta-analysis of gallstone disease

Amit D. Joshi<sup>1,2,3\*,‡</sup>, Charlotte Andersson<sup>4,\*‡</sup>, Stephan Buch<sup>5,\*</sup>, Stefan Stender<sup>6,\*</sup>, Raymond Noordam<sup>7,8\*</sup>, Lu-Chen Weng<sup>9,\*</sup>, Peter E. Weeke<sup>10,11\*</sup>, Paul L. Auer<sup>12,13</sup>, Bernhard Boehm<sup>14</sup>, Constance Chen<sup>1</sup>, Hyon Choi<sup>15</sup>, Gary Curhan<sup>16,17</sup>, Joshua C. Denny<sup>10,18</sup>, Immaculata De Vivo<sup>1,16,19</sup>, John D. Eicher<sup>4,20</sup>, David Ellinghaus<sup>21</sup>, Aaron R. Folsom<sup>9</sup>, Charles Fuchs<sup>16,22</sup>, Manish Gala<sup>2</sup>, Jeffrey Haessler<sup>13</sup>, Albert Hofman<sup>8</sup>, Frank Hu<sup>19,23</sup>, David J. Hunter<sup>1,19</sup>, Harry L.A. Janssen<sup>24,25</sup>, Jae H. Kang<sup>16</sup>, Charles Kooperberg<sup>13</sup>, Peter Kraft<sup>1,19</sup>, Wolfgang Kratzer<sup>14</sup>, Wolfgang Lieb<sup>26</sup>, Pamela L. Lutsey<sup>9</sup>, Sarwa Darwish Murad<sup>24</sup>, Børge G. Nordestgaard<sup>27,28,29</sup>, Louis R. Pasquale<sup>16,30</sup>, Alex P. Reiner<sup>13</sup>, Paul M Ridker<sup>31</sup>, Eric Rimm<sup>16,19,23</sup>, Lynda M. Rose<sup>31</sup>, Christian M. Shaffer<sup>10</sup>, Clemens Schafmayer<sup>32</sup>, Rulla M. Tamimi<sup>16,19</sup>, André G Uitterlinden<sup>7,8</sup>, Uwe Völker<sup>33</sup>, Henry Völzke<sup>34,35,36</sup>, Yoshiyuki Wakabayashi<sup>37</sup>, Janey L. Wiggs<sup>30</sup>, Jun Zhu<sup>37</sup>, Dan M. Roden<sup>10,†</sup>, Bruno H. Stricker<sup>7,8†</sup>, Weihong Tang<sup>9,†</sup>, Alexander Teumer<sup>34,†</sup>, Jochen Hampe<sup>5,†</sup>, Anne Tybjaerg-Hansen<sup>6,28,†</sup>, Daniel I. Chasman<sup>31,†</sup>, Andrew T. Chan<sup>2,3,16†,‡</sup>, Andrew D. Johnson<sup>4,20†,‡</sup>

\*equal contribution first co-author

†equal contribution senior co-author

‡to whom correspondence should be addressed

### Institutions:

1) Program in Genetic Epidemiology and Statistical Genetics, Harvard School of Public Health, Boston, MA; 2) Division of Gastroenterology, Department of Medicine, Massachusetts General Hospital and Harvard Medical School, Boston, MA; 3) Clinical and Translational Epidemiology Unit, Massachusetts General Hospital Boston, MA; 4) The National Heart, Lung, and Blood Institute's Framingham Heart Study, Framingham, MA; 5) Medical Department 1, University Hospital Dresden, TU Dresden, Dresden Germany; 6) Department of Clinical Biochemistry, Rigshospitalet, Copenhagen, Denmark; 7) Department of Internal Medicine, Erasmus Medical Center, Rotterdam, the Netherlands; 8) Department of Epidemiology, Erasmus Medical Center, Rotterdam, the Netherlands; 9) Division of Epidemiology and Community Health, School of Public Health, University of Minnesota, MN; 10) Department of Medicine, Vanderbilt University, Nashville, TN; 11) Department of Cardiology, The Heart Centre, Rigshospitalet, Copenhagen University Hospital, Denmark; 12) Joseph J. Zilber School of Public Health, University of Wisconsin, Milwaukee; 13) Division of Public Health Sciences, Fred Hutchinson Cancer Research Center, Seattle, WA; 14) Department of Internal Medicine I, Ulm University Hospital, Ulm, Germany; 15) Division of Rheumatology, Allergy, and Immunology, Massachusetts General Hospital, Boston, MA; 16) Channing Division of Network Medicine, Department of Medicine, Brigham and Women's Hospital and Harvard Medical School, Boston, MA; 17) Renal Division, Department of Medicine, Brigham and Women's Hospital, Boston, MA; 18) Department of Biomedical Informatics, Vanderbilt University, Nashville, TN; 19)

Department of Epidemiology, Harvard School of Public Health, Boston, MA ; 20) Population Sciences Branch, National Heart, Lung, and Blood Institute, National Institutes of Health, Framingham, MA; 21) Institute of Clinical Molecular Biology, Christian-Albrechts-University of Kiel, Kiel, Germany; 22) Department of Medical Oncology, Dana-Farber Cancer Institute and Harvard Medical School, Boston, MA.; 23) Department of Nutrition, Harvard School of Public Health, Boston, MA; 24) Department of Gastroenterology and Hepatology, Erasmus MC, Rotterdam, the Netherlands; 25) Toronto Centre for Liver Disease, Toronto Western and General Hospital, University Health Network, Toronto, Canada; 26) Institute of Epidemiology, Christian Albrechts Universität Kiel, Niemannsweg 11, Kiel, Germany; 27) The Copenhagen General Population Study and 28) Department of Clinical Biochemistry, Herlev Hospital, Herlev Denmark; 29) Faculty of Health and Medical Sciences, University of Copenhagen, Copenhagen, Denmark; 30) Department of Ophthalmology, Harvard Medical School, Massachusetts Eye and Ear Infirmary, Boston, MA; 31) Division of Preventive Medicine, Department of Medicine, Brigham and Women's Hospital and Harvard Medical School, Boston, MA; 32) Department of General, Abdominal, Thoracic and Transplantation Surgery, University of Kiel, Kiel, Germany; 33) Department of Functional Genomics, Interfaculty Institute for Genetics and Functional Genomics, University Medicine Greifswald, Germany; 34) Institute for Community Medicine, University Medicine Greifswald, Greifswald, Germany; 35) German Center for Cardiovascular Research, Partner Site Greifswald; 36) German Center for Diabetes Research, Site Greifswald; 37) The National Heart, Lung, and Blood Institute, DNA Sequencing Core Laboratory, Bethesda, MD

**To whom correspondence should be addressed:**

Amit D. Joshi, MBBS, PhD, Clinical and Translational Epidemiology Unit, Division of Gastroenterology, Massachusetts General Hospital, 55 Fruit Street, Boston , Massachusetts 02114, USA. Tel: [+1 617 724 7558](tel:+16177247558); Email: [ajoshi@hsph.harvard.edu](mailto:ajoshi@hsph.harvard.edu)

Charlotte Andersson, MD, PhD, The Framingham Heart Study, 73 Mt Wayte Avenue, Framingham, Massachusetts 01702, USA. E-mail: [ca@heart.dk](mailto:ca@heart.dk)

Andrew T. Chan, MD, MPH, Massachusetts General Hospital and Harvard Medical School, Clinical and Translational Epidemiology Unit, Division of Gastroenterology, GRJ-825C, Boston, Massachusetts 02114, USA. Tel: [+1 617 724 0283](tel:+16177240283); Fax: [+1 617 726 3673](tel:+16177263673); Email: [achan@mgh.harvard.edu](mailto:achan@mgh.harvard.edu)

Andrew D. Johnson, PhD, Division of Intramural Research, National Heart, Lung and Blood Institute, Cardiovascular Epidemiology and Human Genomics Branch, The Framingham Heart Study, 73 Mt. Wayte Ave., Suite #2, Framingham, MA, 01702, USA. Tel: [+1 508 663 4082](tel:+15086634082); Fax: [+1 508 626 1262](tel:+15086261262); Email: [johnsonad2@nhlbi.nih.gov](mailto:johnsonad2@nhlbi.nih.gov)

Abbreviations used in this paper: ARIC (Atherosclerosis Risk in Communities Study), BioVU (Vanderbilt DNA Biobank), BMI (body mass index), CI (confidence intervals), eSNP, (expression single nucleotide polymorphism), eQTL (expression quantitative trait loci), FHS (Framingham Heart Study), GCTA (genome-wide complex trait analysis), GWAS (genome-wide association studies), HPFS (Health Professionals Follow-up Study), MAF (minor allele frequency), NHS (Nurses' Health Study), OR (odds ratio), RPKM (reads per kilobase per million), SHIP (Study of Health in Pomerania), SNP (single nucleotide polymorphism), WGHS (Women's Genome Health Study).

## Table of Contents

|                                                                                                                                                                                                        |    |
|--------------------------------------------------------------------------------------------------------------------------------------------------------------------------------------------------------|----|
| Supplementary Methods .....                                                                                                                                                                            | 4  |
| Study sample, phenotypes, genotyping and imputation.....                                                                                                                                               | 4  |
| Women’s Genome Health Study (WGHS).....                                                                                                                                                                | 4  |
| Nurses’ Health Study I and II and Health Professional’s Follow Up Studies ...                                                                                                                          | 5  |
| Framingham Heart Study (FHS) .....                                                                                                                                                                     | 7  |
| Rotterdam Study.....                                                                                                                                                                                   | 8  |
| Atherosclerosis Risk in Communities Study (ARIC) .....                                                                                                                                                 | 8  |
| Vanderbilt University BioVU case-control study .....                                                                                                                                                   | 9  |
| SHIP and SHIP-TREND cohorts.....                                                                                                                                                                       | 10 |
| Popgen case-control study.....                                                                                                                                                                         | 10 |
| Kiel case-control replication study.....                                                                                                                                                               | 11 |
| Copenhagen General Study Population and Copenhagen City Heart Study .                                                                                                                                  | 12 |
| Women’s Health Initiative .....                                                                                                                                                                        | 13 |
| Expression QTL and ENCODE regulatory analyses.....                                                                                                                                                     | 14 |
| Genetic risk score and discriminative ability.....                                                                                                                                                     | 15 |
| Acknowledgements.....                                                                                                                                                                                  | 17 |
| References .....                                                                                                                                                                                       | 21 |
| Supplementary Tables .....                                                                                                                                                                             | 28 |
| Supplementary Table 1. Outcome assessment in discovery and replication studies.....                                                                                                                    | 28 |
| Supplementary Table 2. Annotation of nominally significant ( $P < 5 \times 10^{-6}$ ) GWAS SNPs after conditional analysis using GCTA.....                                                             | 29 |
| Supplementary Table 3a. Imputation quality scores <sup>a</sup> in each study of SNPs associated with gallstone disease in discovery sets.....                                                          | 30 |
| Supplementary Table 3b. Results of SNPs associated with gallstone disease in discovery sets after adjusting for BMI.....                                                                               | 30 |
| Supplementary Table 4. Discriminative accuracy of genetic risk score in the replication datasets. ....                                                                                                 | 31 |
| Supplementary Table 5. <i>Post hoc</i> analysis in NHS and HPFS cohorts assuming dominant/ recessive modes of action for GWAS significant SNPs and genotype specific population attributable risk..... | 32 |
| Supplementary Table 6. <i>Post hoc</i> analysis in NHS and HPFS cohorts: Haplotype Analyses at the ABCG5/8 locus in relation to gallstone disease risk. ....                                           | 34 |
| Supplementary Table 7. <i>Post hoc</i> analysis in NHS and HPFS cohorts: Gene-gene interactions (GxG) between GWAS significant SNPs. ....                                                              | 35 |

|                                                                                                                                                                   |    |
|-------------------------------------------------------------------------------------------------------------------------------------------------------------------|----|
| Supplementary Table 8. <i>Post hoc</i> analysis in NHS and HPFS cohorts of GWAS significant SNPs after adjusting for potentially confounding medication use. .... | 36 |
| Supplementary Table 9. <i>Post hoc</i> analysis in NHS and HPFS cohorts: Association of previously reported UGT1A1 SNP rs6742078. ....                            | 37 |
| Supplementary Table 10. Concordant <i>cis</i> -eQTLs at gallstone GWAS susceptibility loci. ....                                                                  | 38 |
| Supplementary Table 11. Regulatory annotations for gallstone SNPs with eQTL associations. ....                                                                    | 41 |
| Supplementary Table 12. Results of querying gallstone SNPs and proxies ( $r^2 > 0.8$ ) in the GRASP GWAS database v. 2.0. ....                                    | 45 |
| Supplementary Table 13. Results of querying gallstone SNPs and proxies ( $r^2 > 0.8$ ) in the atlas of genetic influences on human blood metabolites. ....        | 47 |
| Supplementary Figures .....                                                                                                                                       | 48 |
| Supplementary Figure 2 Q-Q plot of gallstones disease GWAS meta-analysis. ....                                                                                    | 49 |
| Supplementary Figure 3 Regional association plots for discovered loci in GWAS meta-analysis. ....                                                                 | 50 |
| Supplementary Figure 3A – ABCG8 locus .....                                                                                                                       | 50 |
| Supplementary Figure 3B – CYP7A1 locus .....                                                                                                                      | 51 |
| Supplementary Figure 3C – GCKR locus .....                                                                                                                        | 52 |
| Supplementary Figure 3D – TM4SF4 locus .....                                                                                                                      | 53 |
| Supplementary Figure 3E – SULT2A1 locus .....                                                                                                                     | 54 |
| Supplementary Figure 4. Receiver operator characteristic plots in replication studies. ....                                                                       | 55 |
| Supplementary Figure 5. RNA sequencing results from gallbladder and liver from chronic gallstones case and normal gallbladders. ....                              | 60 |

## Supplementary Methods

### Study sample, phenotypes, genotyping and imputation

#### Women’s Genome Health Study (WGHS)

The Women’s Genome Health Study (WGHS) is a prospective cohort of initially healthy, female North American health care professionals at least 45 years old at baseline representing participants in the Women’s Health Study (WHS) who provided

a blood sample at baseline and consent for blood-based analyses. The WHS was a 2x2 trial beginning in 1992-1994 of vitamin E and low dose aspirin in prevention of cancer and cardiovascular disease with about 10 years of follow-up. Since the end of the trial, follow-up has continued in observational mode. Additional information related to health and lifestyle were collected by questionnaire throughout the WHS trial and continuing observational follow-up.

Genotyping in the WGHS sample was performed using the HumanHap300 Duo “+” chips or the combination of the HumanHap300 Duo and iSelect chips (Illumina, San Diego, CA) with the Infinium II protocol<sup>1</sup>. In either case, the custom SNP content was the same; these custom SNPs were chosen without regard to minor allele frequency (MAF) to saturate candidate genes for cardiovascular disease as well as to increase coverage of SNPs with known or suspected biological function, e.g. disease association, non-synonymous changes, substitutions at splice sites, etc. For quality control, all samples were required to have successful genotyping using the BeadStudio v. 3.3 software (Illumina, San Diego, CA) for at least 98% of the SNPs. A subset of 23,294 individuals were identified with self-reported European ancestry that could be verified on the basis of multidimensional scaling analysis of identity by state using 1443 ancestry informative markers in PLINK v. 1.06. In the final dataset of these individuals, a total of 339,596 SNPs were retained with MAF >1%, successful genotyping in 90% of the subjects, and deviations from Hardy-Weinberg equilibrium not exceeding  $P=10^{-6}$  in significance. Among the final 23,294 individuals of verified European ancestry, genotypes for a total of 2,608,509 SNPs were imputed from the experimental genotypes for 340,349 SNPs and LD relationships implicit in the HapMap r. 22 CEU samples. Imputation was performed with MaCH 1.0.16.

## **Nurses’ Health Study I and II and Health Professional’s Follow Up Studies**

The Nurses' Health Studies comprise female registered nurses in the U.S. In 1976 121,700 women between 30 and 55 years of age were included in the NHS I cohort. In 1989, 116,430 female registered nurses between 25 and 42 years of age were enrolled in NHS II. All individuals completed a baseline mailed questionnaire on their medical history and lifestyle characteristics. Every other year, follow-up questionnaires are sent to both cohorts to update newly diagnosed medical conditions. The response rates have consistently exceeded 90%. The NHS I and II were approved by the institutional review board on the use of human subjects in research of the Brigham and Women's Hospital and Harvard School of Public Health in Boston.

The Health Professionals Follow-up Study comprises 51,529 men aged 40-75 years in 1986 (29,683 dentists, 10,098 veterinary surgeons, 4185 pharmacists, 3745 optometrists, 2218 osteopathic physicians, and 1600 podiatrists). The study was approved by the institutional review board on the use of human subjects in research of the Harvard School of Public Health in Boston.

In accordance with previous work, the presence of cholecystectomy or self-reported gallstones in NHS, NHS II and HPFS were used to define cases for the present study.<sup>2</sup> These measures have been validated with high precision previously.<sup>2</sup> Gallstones cases and non-cases for whom genotyping data was available from twelve studies for different primary traits within these Harvard cohorts were included in analysis for the present study. The primary traits were – breast cancer<sup>3</sup>, pancreatic cancer<sup>4</sup>, glaucoma<sup>5</sup>, endometrial cancer<sup>6</sup>, colon cancer<sup>7</sup>, ovarian cancer, glioma<sup>8</sup>, prostate cancer<sup>9</sup>, type 2 diabetes<sup>10</sup>, coronary heart disease<sup>11</sup>, kidney stone, gout and mammographic density<sup>12</sup>. Study participants from three broad platform categories – the earlier generation of Illumina arrays (HumanHap), the Illumina OmniExpress array and Affymetrix 6.0 array were grouped into three non-overlapping datasets –

HumanHap comprising six GWAS datasets, OmniExpress comprising four GWAS datasets and Affymetrix 6.0 comprising two GWAS datasets. Imputation was done separately for the three datasets using 1000 Genomes Project ALL Phase I Integrated Release Version 3 Haplotypes excluding monomorphic and singleton sites as reference panel. We obtained dataset specific effect size estimates for the risk of gallstone disease by logistic regression analysis assuming log-additive genetic effects, adjusting for age, cohort (includes gender), primary trait, and top for eigenvectors. We further adjusted for BMI in the sensitivity analysis. All analyses in were performed using ProbABEL<sup>13</sup>.

### **Framingham Heart Study (FHS)**

The Framingham Heart Study is a prospective community-based observational study aiming to investigate risk factors for cardiovascular disease initiated in 1948 by enrollment of the original cohort (n=5209).<sup>14</sup> In 1971 the children of the original cohort and their spouses were enrolled into the offspring cohort (n=5124).<sup>15</sup> For the present study we used data from both the original and offspring cohorts. Cases were identified as having a history of gallstones based on questionnaires asking direct questions about prior gallstones, gallbladder disease, or gallbladder surgery. Such questionnaires were available at exam 12 (1971-1974, mean age 64 years), 13, 17, and 18 (1983-85, mean age 74) for the original cohort, and for exam 6 (1995-98, mean age 59, and 7 (1998-2001, mean age 62) for the offspring cohort. Cases were defined as cases from the day where they first replied ‘yes’ to any of the questions and controls were defined as controls after the last exam in which they had been consecutively free of gallbladder disease. DNA was extracted and genotyped for consenting FHS participants with Affymetrix 500K arrays and additional gene focused 50K arrays in the SNP Health Association Resource (SHARe) project. FHS

used MACH 1.0 to impute ~2.54 million SNPs based on the HapMap CEU phased haplotypes (build 22). SNPs used in the imputation process for FHS met the following criteria:  $MAF \geq 1\%$ ,  $HWE P > 1.0 \times 10^{-6}$ , SNP call rate  $>97.0\%$ , MISHAP test  $P > 1.0 \times 10^{-9}$ , Mendelian errors  $<100$ .

### **Rotterdam Study**

The Rotterdam Study is a prospective cohort study in a suburb (Ommoord) in Rotterdam, the Netherlands<sup>16</sup>. Between 1990-1991, all inhabitants aged 55 years and older were invited to participate. In total, 7,983 inhabitants agreed to participate (response rate 78%). At baseline, participants were enquired about a history of gallstone disease. Furthermore, they were linked to a hospital admission registry in the region for cases of cholelithiasis, gallbladder disease, cholecystitis, cholecystectomy, or biliary obstruction (ICD-codes 574-576). A total of 5,974 Caucasian participants were successfully genotyped (Illumina 550K). Genotyped data was imputed with the Hapmap reference panel. The Rotterdam Study has been approved by the medical ethics committee according to the “Wet Bevolkingsonderzoek: ERGO” (Population Study Act Rotterdam Study), executed by the Ministry of Health, Welfare and Sports of the Netherlands and written informed consent was obtained from all study participants.

### **Atherosclerosis Risk in Communities Study (ARIC)**

The ARIC study is a population-based prospective cohort study of cardiovascular disease. ARIC included 15,792 individuals aged 45-64 years at baseline (1987-89) from four US communities. Participants have been examined 5 times (1987-89, 1990-92, 1993-95, 1996-98, and 2011-13). For the present study we analyzed prevalent, self-reported cases at the study’s baseline exam (1987-1989).



Information regarding prevalent gallbladder disease at baseline was ascertained retrospectively during the medical history phone interview (1994–96)<sup>17</sup>. During the interview, participants were asked two questions: “Have you ever been diagnosed by a doctor as having gallstones or a gallbladder attack?” and “At what age were you first told you had a gallbladder problem?”. Those who responded “Yes” to the first item and whose response to the second item was an age younger than their age at the baseline exam were defined as having prevalent gallbladder disease at baseline. A participant’s baseline status was set to missing if he/she failed to complete the follow-up medical history interview. DNA was extracted at baseline or the second visit. A genome-wide scan was conducted with the Affymetrix Genome-Wide Human SNP Array 6.0 (Affymetrix, Santa Clara, CA, USA) in almost the whole ARIC cohort. QC at SNP level included exclusion of SNPs for not passing laboratory QC, no chromosome location, monomorphic, call rate <95%, and autosomal SNPs with HWE- $p < 10^{-6}$ . Imputation to approximately 2.5 million autosomal SNPs identified in HapMap Phase II CEU samples was performed using MACH v1.0.16<sup>18</sup>. SNPs that met the following criteria were used in the imputation: MAF  $\geq 1\%$ , call rate  $\geq 95\%$ , and Hardy-Weinberg equilibrium (HWE)- $p \geq 10^{-5}$ . In the primary analysis, we used a logistic regression model with gallbladder disease as the outcome, assuming an additive genetic effect for SNP dosage and adjusted for age, gender, and field centers. We further adjusted for BMI in the sensitivity analysis. All analyses in ARIC were performed by ProbABEL<sup>13</sup>.

### **Vanderbilt University BioVU case-control study**

Cases and controls were identified from the Vanderbilt University, BioVU, which holds data on DNA extracted from blood remaining from routine clinical testing at Vanderbilt University hospital.<sup>19</sup> BioVU is linked to the Vanderbilt

electronic health record, which included discharge diagnoses from all hospitalizations registered on the international classification of diseases (ICD), 9<sup>th</sup> version.<sup>20</sup> For the present study, we identified cases as having  $\geq 2$  ICD-9 codes 574.X [calculus of gallbladder with acute cholecystitis] or a history of cholecystectomy (ICD-9 codes 51.22 [open cholecystectomy], 51.23 [laparoscopic cholecystectomy], or 51.24 [laparoscopic partial cholecystectomy]) that were not performed in conjunction with other intra-abdominal surgeries. Controls comprised an age and sex-matched sample free from any prior gallstone diagnosis (ICD-9 574.X) or related procedures. All cases and controls were manually reviewed; a positive predictive value  $>95\%$  was identified for both cases and controls. Relevant ethical committees approved the study.

### **SHIP and SHIP-TREND cohorts**

SHIP and SHIP-TREND are two independent cohorts from the Study of Health in Pomerania. The SHIP cohort comprised 4308 randomly selected individuals aged 20-79 years from the general population in the Pomerania district in Germany.<sup>21</sup> The first examination of the SHIP cohort was undertaken between 1997 and 2001. Another sample of 4420 adults aged 20–79 years was subsequently included in the SHIP-TREND cohort (first examination in 2008-12). A total of 4081 SHIP and 986 SHIP-TREND subjects with complete GWAS information underwent an abdominal ultrasound (prevalent gallstones, SHIP n=843, SHIP-TREND=67) and a full physical examination (exclusions due to missing ultrasound data or cholecystectomy scar, SHIP n=104, SHIP-TREND n=101). Prior to study participation, all individuals gave written, informed consent.

### **Popgen case-control study**

A community-based sample was recruited via the local population registry between 2005 and 2007 and underwent an additional physical examination between 2010 and

2012 at the POPGEN facilities that included an abdominal ultrasound by a trained physician. All cases with gallstone disease had undergone cholecystectomy (N=60) or were diagnosed with cholelithiasis (N=62) using B-mode ultrasonography. The gallstone-free controls were confirmed to be gallstone-free by ultrasonography. For both cases and controls, the study was restricted to probands of German ethnicity; in other words, only individuals whose parents were born in Germany were included. All cases and controls gave written informed consent prior to the study, and the study protocol has been approved by the institutional review and ethics committees of the Kiel Medical Faculty (Ethikkommission der Medizinischen Fakultät der Christian-Albrechts-Universität Kiel, #A156/03). Details about recruitment and clinical characterization has been reported previously,<sup>22, 23</sup> (<http://www.popgen.de>). Popgen participants were genotyped with Affymetrix 6.0 arrays. Popgen samples were imputed with IMPUTEv2 and ShapeITv1 using default parameters based on the 1000 Genomes phase I haplotypes (build 37). Original files were preprocessed using the following measures: variants with MAF <0.5% or INFO <0.1 were removed

### **Kiel case-control replication study**

German cases were recruited through clinical centers at Kiel University and had all undergone cholecystectomy for cholelithiasis. German controls were all confirmed to be gallstone-free by ultrasonography and were drawn from a randomly selected urban population sample. Details about recruitment and clinical characterization have been reported previously for cases<sup>24</sup> and controls<sup>25</sup>. Written informed consent was obtained from all study participants. The study was approved by the research Ethics Committee of Kiel University Hospital and the Baden-Württemberg General Medical Council (Landesärztekammer Baden-Württemberg).

## **Copenhagen General Study Population and Copenhagen City Heart Study**

Participants in two prospective studies of the Danish general population, the CGPS and CCHS, were combined, yielding a total of 60,988 participants, including 3,599 with symptomatic gallstone disease. Studies were approved by institutional review boards and Danish ethical committees, and were conducted according to the Declaration of Helsinki. Written informed consent was obtained from participants. All participants were white and of Danish descent, as determined by the National Danish Person Registration System. There was no overlap of individuals between the studies.

The CGPS<sup>26, 27</sup> is a prospective study of the Danish general population initiated in 2003 with ongoing enrollment. Individuals were selected based on the National Danish Civil Registration System to reflect the adult Danish population aged 20-100 years. Data were obtained from a self-administered questionnaire reviewed together with an investigator at the day of attendance, a physical examination, and from blood samples including DNA extraction. We included 52,716 consecutive participants from this study in the present analysis. The CCHS<sup>26, 27</sup> is a prospective study of the Danish general population initiated in 1976-78 with follow-up examinations in 1981-83, 1991-94, and 2001-03. Participants were recruited and examined exactly as in the CGPS. Blood samples for DNA extraction were drawn at the 1991-94 and 2001-2003 examinations. We included 8,272 consecutive participants in the present analysis.

In both studies, diagnoses of symptomatic gallstone disease (ICD8: 574-575; ICD10: K80-K81) were collected from the National Danish Patient Registry and the National Danish Causes of Death Registry from January 1, 1977 to May 10th, 2011. The National Danish Patient Registry has information on all patient contacts with all clinical hospital departments and outpatient clinics in Denmark, including emergency

wards (from 1994). The National Danish Causes of Death Registry contains data on the causes of all deaths in Denmark, as reported by hospitals and general practitioners.

### **Women's Health Initiative**

The WHI is a U.S.-wide study focusing on common health issues in postmenopausal women. A total of 161,808 postmenopausal women aged 50–79 years old were recruited between 1993 and 1998, including 12,151 self-identified AAs and 5,469 self-identified HAs. Details of the study design and cohort characteristics have been previously described [Hays J., Hunt J.R., Hubbell F.A., Anderson G.L., Limacher M., Allen C., Rossouw J.E. The Women's Health Initiative recruitment methods and results. *Ann. Epidemiol.* 2003;13(9, Suppl):S18–S77.] Clinical information was collected by self-report and physical examination. All participants provided written informed consent as approved by local Human Subjects Committees. A cohort of 8,515 self-identified AA and 3,642 self-identified HA participants from WHI, who had consented to genetic research, were selected for WHI SHARe ( $n = 12,157$ ) and genotyped on the Affymetrix 6.0 array. Genotype quality control criteria included call rate, concordance rates for blinded and unblinded duplicates, and sex discrepancy. Furthermore, individuals whose genetic ancestries differ from self-reported ethnicities and one individual from each close relative pair were excluded. In total, 11,740 individuals passed all genotype and sample QC criteria (8,153 AA, 3,587 HA). Details of the QC procedures have been described in previous WHI-SHARe studies [Reiner A.P., Beleza S., Franceschini N., Auer P.L., Robinson J.G., Kooperberg C., Peters U., Tang H. Genome-wide association and population genetic analysis of C-reactive protein in African American and Hispanic American women. *Am. J. Hum. Genet.* 2012;91:502–512. Carty C.L., Johnson N.A., Hutter C.M., Reiner A.P., Peters U., Tang H., Kooperberg C. Genome-wide association study of body height in

African Americans: the Women's Health Initiative SNP Health Association Resource (SHARe) Hum. Mol. Genet. 2012;21:711–720.] The sample analyzed in the current study included African American and Hispanic American WHI women for whom both DNA samples were successfully genotyped, and for which information was available for gallbladder disease status as well as study covariates.

## **Expression QTL and ENCODE regulatory analyses**

The eQTL SNPs with gene expression associations with  $P < 5 \times 10^{-06}$  were queried for overlap with ENCODE regulatory features using HaploReg v3 available at [http://www.broadinstitute.org/mammals/haploreg/haploreg\\_v3.php](http://www.broadinstitute.org/mammals/haploreg/haploreg_v3.php).<sup>28</sup> Blood cell related eQTL studies included fresh lymphocytes,<sup>29</sup> fresh leukocytes,<sup>30</sup> leukocyte samples in individuals with Celiac disease,<sup>31</sup> whole blood samples,<sup>32-46</sup> lymphoblastoid cell lines (LCL) derived from asthmatic children,<sup>47, 48</sup> HapMap LCL from 3 populations,<sup>49</sup> a separate study on HapMap CEU LCL,<sup>50</sup> additional LCL population samples,<sup>51-56</sup> CD19+ B cells,<sup>57</sup> primary PHA-stimulated T cells,<sup>51, 54</sup> CD4+ T cells,<sup>58</sup> peripheral blood monocytes,<sup>57, 59, 60</sup> and CD14+ monocytes before and after stimulation with LPS or interferon-gamma,<sup>61</sup> CD11+ dendritic cells before and after Mycobacterium tuberculosis infection,<sup>62</sup> and a separate study of dendritic cells before or after stimulation with LPS, influenza or interferon-beta.<sup>63</sup> Micro-RNA QTLs,<sup>64</sup> and DNase-I QTLs were also queried for LCL.<sup>65</sup>

Non-blood cell tissue eQTLs searched included omental and subcutaneous adipose,<sup>32, 40, 53, 66</sup> stomach,<sup>66</sup> endometrial carcinomas,<sup>67</sup> ER+ and ER- breast cancer tumor cells,<sup>68</sup> liver,<sup>66, 69-72</sup> osteoblasts,<sup>73</sup> intestine,<sup>74</sup> and normal and cancerous colon,<sup>75</sup> skeletal muscle,<sup>76</sup> breast tissue (normal and cancer),<sup>77, 78</sup> lung,<sup>40, 78, 79</sup> skin,<sup>40, 53, 80</sup> primary fibroblasts,<sup>51, 54, 81</sup> sputum,<sup>82</sup> pancreatic islet cells,<sup>83</sup> and heart tissue from left ventricles and left and right atria.<sup>40, 84, 85</sup> Micro-RNA QTLs were also queried for

gluteal and abdominal adipose,<sup>86</sup> and liver.<sup>87</sup> Further mRNA and micro-RNA QTLs were queried from ER+ invasive breast cancer samples, colon-, kidney renal clear-, lung- and prostate-adenocarcinoma samples.<sup>88</sup>

Brain eQTL studies included brain cortex,<sup>59, 89, 90</sup> cerebellar cortex,<sup>91</sup> cerebellum,<sup>90, 92-95</sup> frontal cortex,<sup>91, 92, 94</sup> gliomas,<sup>96</sup> hippocampus,<sup>91, 94</sup> inferior olivary nucleus (from medulla),<sup>91</sup> intralobular white matter,<sup>91</sup> occipital cortex,<sup>91</sup> parietal lobe,<sup>93</sup> pons,<sup>92</sup> pre-frontal cortex,<sup>94, 95, 97, 98</sup> putamen (at the level of anterior commissure),<sup>91</sup> substantia nigra,<sup>91</sup> temporal cortex,<sup>90-92, 94</sup> thalamus,<sup>94</sup> and visual cortex.<sup>95</sup>

Additional eQTL data was integrated from online sources including ScanDB, the Broad Institute GTex browser, and the Pritchard Lab (eqtl.uchicago.edu). Cerebellum, parietal lobe and liver eQTL data was downloaded from ScanDB and cis-eQTLs were limited to those with  $P < 1.0 \times 10^{-6}$  and trans-eQTLs with  $P < 5.0 \times 10^{-8}$ . The top 1000 eQTL results were downloaded from the GTex Browser at the Broad Institute for 9 tissues on 11/26/2013: thyroid, leg skin (sun exposed), tibial nerve, tibial artery, skeletal muscle, lung, heart (left ventricle), whole blood, and subcutaneous adipose.<sup>40</sup> All GTex results had associations with  $p < 8.4 \times 10^{-7}$ .

## **Genetic risk score and discriminative ability**

In the Kiel dataset, the weighted GRS ranged from -2.57 to + 4.27, with a median of -0.047. After adjusting for age, gender and BMI, an increase in 1 standard deviation of weighted GRS was associated with an increased risk of gallstone disease with an OR = 1.50, 95% CI = 1.39, 1.61. The addition of weighted GRS to a risk prediction model with age, gender and BMI, showed modest improvements in the Nagelkerke's R<sup>2</sup> from 0.323 to 0.351 and the area under curve (AUC) for the receiver operating characteristic (ROC) plot from 0.783 to 0.798. (**Supplementary Fig. 4**).

These improvements in risk prediction measures were similar among males and females in the Kiel cohort.

In the NHS/HPFS replication dataset, the weighted GRS ranged from -2.71 to + 4.69, with a median of -0.195. The relative risk associated with a standard deviation increase in genetic risk score was 1.33 (1.23, 1.43), after adjusting for age, gender and BMI at blood draw. The improvement in Nagelkerke's  $R^2$  was from 0.085 to 0.103, and improvement in AUC of the ROC plot from 0.663 to 0.679. The addition of a GRS yielded a greater improvement in risk prediction the NHS (women) compared to the HPFS (men) (**Supplementary Fig. 4**).



## Acknowledgements

In addition to the acknowledgements for the meta-analysis, replication studies and RNA expression studies mentioned in the main manuscript, we would like to acknowledge funding for individual GWAS studies.

This research was funded by NIH grants – ACG Junior Faculty Development Award NIH K23DK103119 (MG), NHGRI U01HG004728 (LRP), NEI R01EY015473(LRP); K24DK098311 (ATC); German Ministry of Education and Research (BMBF) and the Deutsche Forschungsgemeinschaft (DFG) Cluster of Excellence ‘Inflammation at Interfaces.’;

SHIP is part of the Community Medicine Research net of the University of Greifswald, Germany, which is funded by the Federal Ministry of Education and Research (grants no. 01ZZ9603, 01ZZ0103, and 01ZZ0403), the Ministry of Cultural Affairs as well as the Social Ministry of the Federal State of Mecklenburg-West Pomerania, and the network ‘Greifswald Approach to Individualized Medicine (GANI\_MED)’ funded by the Federal Ministry of Education and Research (grant 03IS2061A). SHIP Genome-wide data have been supported by the Federal Ministry of Education and Research (grant no. 03ZIK012) and a joint grant from Siemens Healthcare, Erlangen, Germany and the Federal State of Mecklenburg- West Pomerania. The University of Greifswald is a member of the ‘Center of Knowledge Interchange’ program of the Siemens AG and the Caché Campus program of the InterSystems GmbH.

The generation and management of GWAS genotype data for the Rotterdam Study is supported by the Netherlands Organisation of Scientific Research NWO Investments (nr. 175.010.2005.011, 911-03-012). This study is funded by the Research Institute for Diseases in the Elderly (014-93-015; RIDE2), the Netherlands

Genomics Initiative (NGI)/Netherlands Organisation for Scientific Research (NWO) project nr. 050-060-810. The Rotterdam Study is funded by Erasmus Medical Center and Erasmus University, Rotterdam, Netherlands Organization for the Health Research and Development (ZonMw), the Research Institute for Diseases in the Elderly (RIDE), the Ministry of Education, Culture and Science, the Ministry for Health, Welfare and Sports, the European Commission (DG XII), and the Municipality of Rotterdam.

The Atherosclerosis Risk in Communities Study is carried out as a collaborative study supported by National Heart, Lung, and Blood Institute contracts (HHSN268201100005C, HHSN268201100006C, HHSN268201100007C, HHSN268201100008C, HHSN268201100009C, HHSN268201100010C, HHSN268201100011C, and HHSN268201100012C), R01HL087641, R01HL59367 and R01HL086694; National Human Genome Research Institute contract U01HG004402; and National Institutes of Health contract HHSN268200625226C. Infrastructure was partly supported by Grant Number UL1RR025005, a component of the National Institutes of Health and NIH Roadmap for Medical Research. The dataset used from the Vanderbilt University Medical Center's BioVU was supported by institutional funding and by the Vanderbilt CTSA grant UL1 TR000445 from NCATS/NIH, with additional support from grants U01 HG004603 and RC2 GM092618.

The Nurses' Health Study (NHS) is supported by the National Cancer Institute (NCI, P01CA087969, UM1 CA186107, R01CA137178), the National Institute of Diabetes and Digestive and Kidney Diseases (NIDDK, R01DK058845), and the National Heart, Lung, and Blood Institute (NHLBI, R01HL35464), the National Eye Institute (NEI, R01EY015473), with additional support for the collection and management of

genetic data. The NHS Breast Cancer GWAS (dbGaP:phs000147.v1.p1) was performed as part of the Cancer Genetic Markers of Susceptibility initiative of the NCI (R01CA40356, U01CA98233). The NHS type 2 diabetes (T2D, dbGaP:phs000091.v2.p1) and primary open-angle glaucoma (POAG, dbGaP:phs000308.v1.p1) GWAS were funded as part of the Gene Environment-Association Studies (GENEVA) project under the NIH Genes, Environment, and Health Initiative (T2D: U01HG004399, GA: U01HG004728). Genotyping for the NHS coronary heart disease GWAS was supported by Merck/Rosetta Research Laboratories, North Wales, PA. The NHS kidney stone GWAS (dbGaP:phs000460.v1.p1) was supported by NIDDK (5P01DK070756). The NHS colon cancer GWAS (dbGAP: in progress) was funded as part of the Colorectal Cancer GWAS Consortium funded by the NCI (U01 CA137088).

The Health Professionals Follow-up Study (HPFS) is supported by the National Cancer Institute (P01CA055075, UM1 CA167552, R01CA137178), the National Institute of Diabetes and Digestive and Kidney Diseases (NIDDK, R01DK058845), and the National Heart, Lung, and Blood Institute (NHLBI, R01HL35464), with additional support for the collection and management of genetic data. The HPFS type 2 diabetes (T2D, dbGaP:phs000091.v2.p1) and primary open-angle glaucoma (POAG, dbGaP:phs000308.v1.p1) GWAS were funded as part of the Gene Environment-Association Studies (GENEVA) project under the NIH Genes, Environment, and Health Initiative (T2D: U01HG004399, POAG: U01HG004728). Genotyping for the HPFS coronary heart disease GWAS was supported by Merck/Rosetta Research Laboratories, North Wales, PA. The HPFS kidney stone GWAS (dbGaP:phs000460.v1.p1) was supported by NIDDK (5P01DK070756). The HPFS colon cancer GWAS (dbGAP: in progress) was funded as part of the Colorectal

Cancer GWAS Consortium supported by the NCI (U01 CA137088, R01CA059045).

A Harvard Medical School Distinguished Ophthalmology Scholar Award supports Dr. Louis Pasquale. Dr. Pasquale is also supported by the Harvard Glaucoma Center of Excellence.

The popgen 2.0 network is supported by a grant from the German Ministry for Education and Research (01EY1103).

This work was supported by the National Heart, Lung and Blood Institute's Framingham Heart Study (Contract No. N01-HC-25195) and its contract with Affymetrix, Inc. for genotyping services (Contract No. N02-HL-6-4278). A portion of this research utilized the Linux Cluster for Genetic Analysis (LinGA-II) funded by the Robert Dawson Evans Endowment of the Department of Medicine at Boston University School of Medicine and Boston Medical Center.

The dataset from Vanderbilt University Medical Center used for the analyses described were obtained from Vanderbilt's BioVU, which is supported by institutional funding and by the Vanderbilt CTSA grant ULTR000445 from NCATS/NIH. Genotyping of the BioVU samples was performed by VANTAGE, which is supported by the Vanderbilt Ingram Cancer Center (P30 CA68485), the Vanderbilt Vision Center (P30 EY08126), and NIH/NCRR (G20 RR030956). In addition, funding was also received through the NHGRI grant: U01HG006378.

The WGHS is supported by HL043851 and HL080467 from the National Heart, Lung, and Blood Institute and CA047988 from the National Cancer Institute, the Donald W. Reynolds Foundation and the Fondation Leducq, with collaborative scientific support and funding for genotyping provided by Amgen.

The CGPS and CCHS were supported by the Danish Medical Research Council (grant no. 10-083788); the Research Fund at Rigshospitalet, Copenhagen University Hospital; Chief Physician Johan Boserup and Lise Boserup's Fund; Ingeborg and Leo Dannin's Grant; Henry Hansen and Wife's Grant; and a grant from the Odd Fellow Order.

The Women's Health Initiative (WHI) program is funded by the National Heart, Lung, and Blood Institute, National Institutes of Health, and the United States Department of Health and Human Services through contracts HHSN268201100046C, HHSN268201100001C, HHSN268201100002C, HHSN268201100003C, HHSN268201100004C, and HHSN271201100004C. The authors thank the WHI investigators and staff for their dedication and the study participants for making the program possible.

## References

1. Ridker PM, Chasman DI, Zee RY, et al. Rationale, design, and methodology of the Women's Genome Health Study: a genome-wide association study of more than 25,000 initially healthy American women. *Clin Chem* 2008;54:249-55.
2. Tsai CJ, Leitzmann MF, Willett WC, et al. Statin use and the risk of cholecystectomy in women. *Gastroenterology* 2009;136:1593-600.
3. Hunter DJ, Kraft P, Jacobs KB, et al. A genome-wide association study identifies alleles in *FGFR2* associated with risk of sporadic postmenopausal breast cancer. *Nat Genet* 2007;39:870-4.
4. Amundadottir L, Kraft P, Stolzenberg-Solomon RZ, et al. Genome-wide association study identifies variants in the *ABO* locus associated with susceptibility to pancreatic cancer. *Nat Genet* 2009;41:986-90.
5. Wiggs JL, Kang JH, Yaspan BL, et al. Common variants near *CAV1* and *CAV2* are associated with primary open-angle glaucoma in Caucasians from the USA. *Hum Mol Genet* 2011;20:4707-13.
6. De Vivo I, Prescott J, Setiawan VW, et al. Genome-wide association study of endometrial cancer in E2C2. *Hum Genet* 2014;133:211-24.
7. Peters U, Jiao S, Schumacher FR, et al. Identification of Genetic Susceptibility Loci for Colorectal Tumors in a Genome-Wide Meta-analysis. *Gastroenterology* 2013;144:799-807 e24.
8. Rajaraman P, Melin BS, Wang Z, et al. Genome-wide association study of glioma and meta-analysis. *Hum Genet* 2012;131:1877-88.

9. Schumacher FR, Berndt SI, Siddiq A, et al. Genome-wide association study identifies new prostate cancer susceptibility loci. *Hum Mol Genet* 2011;20:3867-75.
10. Qi L, Cornelis MC, Kraft P, et al. Genetic variants at 2q24 are associated with susceptibility to type 2 diabetes. *Hum Mol Genet* 2010;19:2706-15.
11. Jensen MK, Pers TH, Dworzynski P, et al. Protein interaction-based genome-wide analysis of incident coronary heart disease. *Circ Cardiovasc Genet* 2011;4:549-56.
12. Stevens KN, Lindstrom S, Scott CG, et al. Identification of a novel percent mammographic density locus at 12q24. *Hum Mol Genet* 2012;21:3299-305.
13. Aulchenko YS, Struchalin MV, van Duijn CM. ProbABEL package for genome-wide association analysis of imputed data. *BMC Bioinformatics* 2010;11:134.
14. Dawber TR, Meadors GF, Moore FE, Jr. Epidemiological approaches to heart disease: the Framingham Study. *Am J Public Health Nations Health* 1951;41:279-81.
15. Kannel WB, Feinleib M, McNamara PM, et al. An investigation of coronary heart disease in families. The Framingham offspring study. *American journal of epidemiology* 1979;110:281-90.
16. Hofman A, Grobbee DE, de Jong PT, et al. Determinants of disease and disability in the elderly: the Rotterdam Elderly Study. *Eur J Epidemiol* 1991;7:403-22.
17. Boland LL, Folsom AR, Rosamond WD, et al. Hyperinsulinemia, dyslipidemia, and obesity as risk factors for hospitalized gallbladder disease. A prospective study. *Ann Epidemiol* 2002;12:131-40.
18. Li Y, Willer CJ, Ding J, et al. MaCH: using sequence and genotype data to estimate haplotypes and unobserved genotypes. *Genet Epidemiol* 2010;34:816-34.
19. Ritchie MD, Denny JC, Crawford DC, et al. Robust replication of genotype-phenotype associations across multiple diseases in an electronic medical record. *Am J Hum Genet* 2010;86:560-72.
20. Pendergrass S, Dudek SM, Roden DM, et al. Visual integration of results from a large DNA biobank (BioVU) using synthesis-view. *Pac Symp Biocomput* 2011:265-75.
21. Volzke H, Alte D, Schmidt CO, et al. Cohort profile: the study of health in Pomerania. *Int J Epidemiol* 2011;40:294-307.
22. Krawczak M, Nikolaus S, von Eberstein H, et al. PopGen: population-based recruitment of patients and controls for the analysis of complex genotype-phenotype relationships. *Community Genet* 2006;9:55-61.
23. Nothlings U, Krawczak M. [PopGen. A population-based biobank with prospective follow-up of a control group]. *Bundesgesundheitsblatt Gesundheitsforschung Gesundheitsschutz* 2012;55:831-5.
24. **Buch S, Schafmayer C**, Volzke H, et al. A genome-wide association scan identifies the hepatic cholesterol transporter ABCG8 as a susceptibility factor for human gallstone disease. *Nat Genet* 2007;39:995-9.
25. Walcher T, Haenle MM, Kron M, et al. Pregnancy is not a risk factor for gallstone disease: results of a randomly selected population sample. *World J Gastroenterol* 2005;11:6800-6.

26. Stender S, Frikke-Schmidt R, Nordestgaard BG, et al. The ABCG5/8 cholesterol transporter and myocardial infarction versus gallstone disease. *J Am Coll Cardiol* 2014;63:2121-8.
27. Jorgensen AB, Frikke-Schmidt R, Nordestgaard BG, et al. Loss-of-function mutations in APOC3 and risk of ischemic vascular disease. *N Engl J Med* 2014;371:32-41.
28. Ward LD, Kellis M. HaploReg: a resource for exploring chromatin states, conservation, and regulatory motif alterations within sets of genetically linked variants. *Nucleic acids research* 2012;40:D930-4.
29. Goring HH, Curran JE, Johnson MP, et al. Discovery of expression QTLs using large-scale transcriptional profiling in human lymphocytes. *Nature genetics* 2007;39:1208-16.
30. Idaghdour Y, Czika W, Shianna KV, et al. Geographical genomics of human leukocyte gene expression variation in southern Morocco. *Nature genetics* 2010;42:62-7.
31. Heap GA, Trynka G, Jansen RC, et al. Complex nature of SNP genotype effects on gene expression in primary human leucocytes. *BMC medical genomics* 2009;2:1.
32. Emilsson V, Thorleifsson G, Zhang B, et al. Genetics of gene expression and its effect on disease. *Nature* 2008;452:423-8.
33. Fehrmann RS, Jansen RC, Veldink JH, et al. Trans-eQTLs reveal that independent genetic variants associated with a complex phenotype converge on intermediate genes, with a major role for the HLA. *PLoS genetics* 2011;7:e1002197.
34. **Mehta D, Heim K**, Herder C, et al. Impact of common regulatory single-nucleotide variants on gene expression profiles in whole blood. *European journal of human genetics : EJHG* 2013;21:48-54.
35. Zhernakova DV, de Klerk E, Westra HJ, et al. DeepSAGE reveals genetic variants associated with alternative polyadenylation and expression of coding and non-coding transcripts. *PLoS genetics* 2013;9:e1003594.
36. Sasayama D, Hori H, Nakamura S, et al. Identification of single nucleotide polymorphisms regulating peripheral blood mRNA expression with genome-wide significance: an eQTL study in the Japanese population. *PloS one* 2013;8:e54967.
37. Landmark-Hoyvik H, Dumeaux V, Nebdal D, et al. Genome-wide association study in breast cancer survivors reveals SNPs associated with gene expression of genes belonging to MHC class I and II. *Genomics* 2013;102:278-87.
38. **Westra HJ, Peters MJ, Esko T**, et al. Systematic identification of trans eQTLs as putative drivers of known disease associations. *Nature genetics* 2013;45:1238-43.
39. **van Eijk KR, de Jong S**, Boks MP, et al. Genetic analysis of DNA methylation and gene expression levels in whole blood of healthy human subjects. *BMC genomics* 2012;13:636.
40. The Genotype-Tissue Expression (GTEx) project. *Nature genetics* 2013;45:580-5.
41. Battle A, Mostafavi S, Zhu X, et al. Characterizing the genetic basis of transcriptome diversity through RNA-sequencing of 922 individuals. *Genome research* 2014;24:14-24.

42. Benton MC, Lea RA, Macartney-Coxson D, et al. Mapping eQTLs in the Norfolk Island genetic isolate identifies candidate genes for CVD risk traits. *American journal of human genetics* 2013;93:1087-99.
43. Narahara M, Higasa K, Nakamura S, et al. Large-scale East-Asian eQTL mapping reveals novel candidate genes for LD mapping and the genomic landscape of transcriptional effects of sequence variants. *PloS one* 2014;9:e100924.
44. **Quinlan J, Idaghdour Y, Goulet JP, et al.** Genomic architecture of sickle cell disease in West African children. *Frontiers in genetics* 2014;5:26.
45. **Wright FA, Sullivan PF, Brooks AI, et al.** Heritability and genomics of gene expression in peripheral blood. *Nature genetics* 2014;46:430-7.
46. **Schramm K, Marzi C, Schurmann C, et al.** Mapping the genetic architecture of gene regulation in whole blood. *PloS one* 2014;9:e93844.
47. **Dixon AL, Liang L, Moffatt MF, et al.** A genome-wide association study of global gene expression. *Nature genetics* 2007;39:1202-7.
48. Liang L, Morar N, Dixon AL, et al. A cross-platform analysis of 14,177 expression quantitative trait loci derived from lymphoblastoid cell lines. *Genome research* 2013;23:716-26.
49. Stranger BE, Nica AC, Forrest MS, et al. Population genomics of human gene expression. *Nature genetics* 2007;39:1217-24.
50. Kwan T, Benovoy D, Dias C, et al. Genome-wide analysis of transcript isoform variation in humans. *Nature genetics* 2008;40:225-31.
51. **Dimas AS, Deutsch S, Stranger BE, et al.** Common regulatory variation impacts gene expression in a cell type-dependent manner. *Science* 2009;325:1246-50.
52. Cusanovich DA, Billstrand C, Zhou X, et al. The combination of a genome-wide association study of lymphocyte count and analysis of gene expression data reveals novel asthma candidate genes. *Human molecular genetics* 2012;21:2111-23.
53. **Grundberg E, Small KS, Hedman AK, et al.** Mapping cis- and trans-regulatory effects across multiple tissues in twins. *Nature genetics* 2012;44:1084-9.
54. Gutierrez-Arcelus M, Lappalainen T, Montgomery SB, et al. Passive and active DNA methylation and the interplay with genetic variation in gene regulation. *eLife* 2013;2:e00523.
55. **Mangravite LM, Engelhardt BE, Medina MW, et al.** A statin-dependent QTL for GATM expression is associated with statin-induced myopathy. *Nature* 2013;502:377-80.
56. Bryois J, Buil A, Evans DM, et al. Cis and trans effects of human genomic variants on gene expression. *PLoS genetics* 2014;10:e1004461.
57. Fairfax BP, Makino S, Radhakrishnan J, et al. Genetics of gene expression in primary immune cells identifies cell type-specific master regulators and roles of HLA alleles. *Nature genetics* 2012;44:502-10.
58. Murphy A, Chu JH, Xu M, et al. Mapping of numerous disease-associated expression polymorphisms in primary peripheral blood CD4+ lymphocytes. *Human molecular genetics* 2010;19:4745-57.
59. **Heinzen EL, Ge D, Cronin KD, et al.** Tissue-specific genetic control of splicing: implications for the study of complex traits. *PLoS biology* 2008;6:e1.



60. Zeller T, Wild P, Szymczak S, et al. Genetics and beyond--the transcriptome of human monocytes and disease susceptibility. *PloS one* 2010;5:e10693.
61. Fairfax BP, Humburg P, Makino S, et al. Innate immune activity conditions the effect of regulatory variants upon monocyte gene expression. *Science* 2014;343:1246949.
62. **Barreiro LB, Tailleux L**, Pai AA, et al. Deciphering the genetic architecture of variation in the immune response to *Mycobacterium tuberculosis* infection. *Proceedings of the National Academy of Sciences of the United States of America* 2012;109:1204-9.
63. **Lee MN, Ye C**, Villani AC, et al. Common genetic variants modulate pathogen-sensing responses in human dendritic cells. *Science* 2014;343:1246980.
64. Huang RS, Gamazon ER, Ziliak D, et al. Population differences in microRNA expression and biological implications. *RNA biology* 2011;8:692-701.
65. **Degner JF, Pai AA, Pique-Regi R**, et al. DNase I sensitivity QTLs are a major determinant of human expression variation. *Nature* 2012;482:390-4.
66. Greenawalt DM, Dobrin R, Chudin E, et al. A survey of the genetics of stomach, liver, and adipose gene expression from a morbidly obese cohort. *Genome research* 2011;21:1008-16.
67. Kompass KS, Witte JS. Co-regulatory expression quantitative trait loci mapping: method and application to endometrial cancer. *BMC medical genomics* 2011;4:6.
68. Li Q, Seo JH, Stranger B, et al. Integrative eQTL-based analyses reveal the biology of breast cancer risk loci. *Cell* 2013;152:633-41.
69. **Schadt EE, Molony C, Chudin E**, et al. Mapping the genetic architecture of gene expression in human liver. *PLoS biology* 2008;6:e107.
70. **Innocenti F, Cooper GM**, Stanaway IB, et al. Identification, replication, and functional fine-mapping of expression quantitative trait loci in primary human liver tissue. *PLoS genetics* 2011;7:e1002078.
71. Schroder A, Klein K, Winter S, et al. Genomics of ADME gene expression: mapping expression quantitative trait loci relevant for absorption, distribution, metabolism and excretion of drugs in human liver. *The pharmacogenomics journal* 2013;13:12-20.
72. Wang X, Tang H, Teng M, et al. Mapping of hepatic expression quantitative trait loci (eQTLs) in a Han Chinese population. *Journal of medical genetics* 2014;51:319-26.
73. **Grundberg E, Kwan T**, Ge B, et al. Population genomics in a disease targeted primary cell model. *Genome research* 2009;19:1942-52.
74. Kabakchiev B, Silverberg MS. Expression quantitative trait loci analysis identifies associations between genotype and gene expression in human intestine. *Gastroenterology* 2013;144:1488-96, 1496 e1-3.
75. Ongen H, Andersen CL, Bramsen JB, et al. Putative cis-regulatory drivers in colorectal cancer. *Nature* 2014;512:87-90.
76. Keildson S, Fadista J, Ladenvall C, et al. Expression of phosphofructokinase in skeletal muscle is influenced by genetic variation and associated with insulin sensitivity. *Diabetes* 2014;63:1154-65.

77. Quigley DA, Fiorito E, Nord S, et al. The 5p12 breast cancer susceptibility locus affects MRPS30 expression in estrogen-receptor positive tumors. *Molecular oncology* 2014;8:273-84.
78. **Hao K, Bosse Y, Nickle DC**, et al. Lung eQTLs to help reveal the molecular underpinnings of asthma. *PLoS genetics* 2012;8:e1003029.
79. Gao C, Tignor NL, Salit J, et al. HEFT: eQTL analysis of many thousands of expressed genes while simultaneously controlling for hidden factors. *Bioinformatics* 2014;30:369-76.
80. **Ding J, Gudjonsson JE**, Liang L, et al. Gene expression in skin and lymphoblastoid cells: Refined statistical method reveals extensive overlap in cis-eQTL signals. *American journal of human genetics* 2010;87:779-89.
81. Wagner JR, Busche S, Ge B, et al. The relationship between DNA methylation, genetic and expression inter-individual variation in untransformed human fibroblasts. *Genome biology* 2014;15:R37.
82. Qiu W, Cho MH, Riley JH, et al. Genetics of sputum gene expression in chronic obstructive pulmonary disease. *PloS one* 2011;6:e24395.
83. Fadista J, Vikman P, Laakso EO, et al. Global genomic and transcriptomic analysis of human pancreatic islets reveals novel genes influencing glucose metabolism. *Proceedings of the National Academy of Sciences of the United States of America* 2014;111:13924-9.
84. **Koopmann TT, Adriaens ME**, Moerland PD, et al. Genome-wide identification of expression quantitative trait loci (eQTLs) in human heart. *PloS one* 2014;9:e97380.
85. Lin H, Dolmatova EV, Morley MP, et al. Gene expression and genetic variation in human atria. *Heart rhythm : the official journal of the Heart Rhythm Society* 2014;11:266-71.
86. Rantalainen M, Herrera BM, Nicholson G, et al. MicroRNA expression in abdominal and gluteal adipose tissue is associated with mRNA expression levels and partly genetically driven. *PloS one* 2011;6:e27338.
87. Gamazon ER, Innocenti F, Wei R, et al. A genome-wide integrative study of microRNAs in human liver. *BMC genomics* 2013;14:395.
88. Li Q, Stram A, Chen C, et al. Expression QTL-based analyses reveal candidate causal genes and loci across five tumor types. *Human molecular genetics* 2014;23:5294-302.
89. **Webster JA, Gibbs JR**, Clarke J, et al. Genetic control of human brain transcript expression in Alzheimer disease. *American journal of human genetics* 2009;84:445-58.
90. Zou F, Chai HS, Younkin CS, et al. Brain expression genome-wide association study (eGWAS) identifies human disease-associated variants. *PLoS genetics* 2012;8:e1002707.
91. **Ramasamy A, Trabzuni D, Guelfi S**, et al. Genetic variability in the regulation of gene expression in ten regions of the human brain. *Nature neuroscience* 2014;17:1418-28.
92. **Gibbs JR, van der Brug MP, Hernandez DG**, et al. Abundant quantitative trait loci exist for DNA methylation and gene expression in human brain. *PLoS genetics* 2010;6:e1000952.
93. Gamazon ER, Badner JA, Cheng L, et al. Enrichment of cis-regulatory gene expression SNPs and methylation quantitative trait loci among bipolar disorder susceptibility variants. *Molecular psychiatry* 2013;18:340-6.

94. Kim S, Cho H, Lee D, et al. Association between SNPs and gene expression in multiple regions of the human brain. *Translational psychiatry* 2012;2:e113.
95. **Zhang B, Gaiteri C, Bodea LG**, et al. Integrated systems approach identifies genetic nodes and networks in late-onset Alzheimer's disease. *Cell* 2013;153:707-20.
96. Shpak M, Hall AW, Goldberg MM, et al. An eQTL analysis of the human glioblastoma multiforme genome. *Genomics* 2014;103:252-63.
97. **Colantuoni C, Lipska BK**, Ye T, et al. Temporal dynamics and genetic control of transcription in the human prefrontal cortex. *Nature* 2011;478:519-23.
98. Liu C, Cheng L, Badner JA, et al. Whole-genome association mapping of gene expression in the human prefrontal cortex. *Molecular psychiatry* 2010;15:779-84.

Author names in bold designate shared co-first authors.

## Supplementary Tables

**Supplementary Table 1. Outcome assessment in discovery and replication studies**

| <b>Discovery studies</b>                         | <b>Ascertainment of gallstone disease in discovery/ replication studies.</b>                                                                                                                                                                                                                                                                                                              |
|--------------------------------------------------|-------------------------------------------------------------------------------------------------------------------------------------------------------------------------------------------------------------------------------------------------------------------------------------------------------------------------------------------------------------------------------------------|
| WGHS                                             | Cases were identified based on questionnaires asking direct questions about gallbladder surgery.                                                                                                                                                                                                                                                                                          |
| NHS1/2/ HPFS Affymetrix<br>NHS1/2/ HPFS Illumina | Cases were identified based on self-report in questionnaires that asked about having physician diagnosed gallstone disease or having undergone cholecystectomy in each follow up cycle.                                                                                                                                                                                                   |
| SHIP                                             | Participants underwent an abdominal ultrasound to identify gallstones and a full physical examination (and participants were excluded due to missing ultrasound data or cholecystectomy scar).                                                                                                                                                                                            |
| ARIC                                             | "Have you ever been diagnosed by a doctor as having gallstones or a gallbladder attack?"                                                                                                                                                                                                                                                                                                  |
| Rotterdam                                        | Participants were linked to a hospital admission registry in the region for cases of cholelithiasis, gallbladder disease, cholecystitis, cholecystectomy, or biliary obstruction (ICD-codes 574-576).                                                                                                                                                                                     |
| FHS                                              | Cases were identified as having a history of gallstones based on questionnaires asking direct questions about prior gallstones, gallbladder disease, or gallbladder surgery.                                                                                                                                                                                                              |
| BioVU                                            | For the present study, cases were identified as having $\geq 2$ ICD-9 codes codes 574.X [calculus of gallbladder with acute cholecystitis] or a history of cholecystectomy (ICD-9 codes 51.22 [open cholecystectomy], 51.23 [laparoscopic cholecystectomy], or 51.24 [laparoscopic partial cholecystectomy]) that were not performed in conjunction with other intra-abdominal surgeries. |
| SPC (PopGen)                                     | All cases with gallstone disease had undergone cholecystectomy or were diagnosed with cholecystolithiasis using B-mode ultrasonography. The gallstone-free controls were confirmed to be gallstone-free by ultrasonography.                                                                                                                                                               |
| SHIP-TREND                                       | Participants underwent an abdominal ultrasound to identify gallstones and a full physical examination (and participants were excluded due to missing ultrasound data or cholecystectomy scar).                                                                                                                                                                                            |
| <b>All discovery samples</b>                     |                                                                                                                                                                                                                                                                                                                                                                                           |
| <b>Replication studies</b>                       |                                                                                                                                                                                                                                                                                                                                                                                           |
| CCHS and CGPS                                    | Diagnoses of symptomatic gallstone disease (ICD8: 574-575; ICD10: K80-K81) were collected from the National Danish Patient Registry and the National Danish Causes of Death Registry                                                                                                                                                                                                      |
| Kiel University                                  | Hospital-based case-control study in which German cases were recruited through clinical centers at Kiel University and had all undergone cholecystectomy for cholecystolithiasis. German controls were all confirmed to be gallstone-free by ultrasonography and were drawn from a randomly selected urban population sample                                                              |
| WHI                                              | Cases were identified based on questionnaires asking about prior gallstones or gallbladder disease.                                                                                                                                                                                                                                                                                       |

**Supplementary Table 2. Annotation of nominally significant ( $P < 5 \times 10^{-6}$ ) GWAS SNPs after conditional analysis using GCTA.**

| Chr | SNP        | HG38 location | Ref Allele | Freq Ref | Beta   | $P$ -meta-analysis     | $P$ -conditional       | Gene            | Annotation                              |
|-----|------------|---------------|------------|----------|--------|------------------------|------------------------|-----------------|-----------------------------------------|
| 2   | rs1260326  | 2:27508073    | T          | 0.412    | -0.113 | $2.55 \times 10^{-10}$ | $2.65 \times 10^{-10}$ | <i>GCKR</i>     | Missense variant; splice region variant |
| 2   | rs1025447  | 2:43795831    | T          | 0.831    | 0.165  | $4.21 \times 10^{-12}$ | $6.14 \times 10^{-10}$ | <i>DYNC2LI1</i> | intron variant                          |
| 2   | rs11887534 | 2:43839108    | C          | 0.066    | 0.527  | $2.44 \times 10^{-60}$ | $2.01 \times 10^{-47}$ | <i>ABCG8</i>    | missense variant                        |
| 2   | rs4299376  | 2:43845437    | T          | 0.685    | 0.237  | $1.18 \times 10^{-34}$ | $3.39 \times 10^{-21}$ | <i>ABCG8</i>    | intron variant                          |
| 3   | rs4234161  | 3:72266437    | C          | 0.762    | 0.099  | $4.44 \times 10^{-06}$ | $4.66 \times 10^{-06}$ | -               | intergenic variant                      |
| 3   | rs9843304  | 3:149493600   | T          | 0.547    | -0.113 | $6.09 \times 10^{-11}$ | $5.54 \times 10^{-11}$ | <i>TM4SF4</i>   | intron variant                          |
| 6   | rs6927914  | 6:60664964    | T          | 0.223    | -0.041 | 0.05689                | $3.91 \times 10^{-06}$ | -               | intergenic variant                      |
| 6   | rs6904350  | 6:60992067    | C          | 0.392    | 0.084  | $2.34 \times 10^{-06}$ | $1.46 \times 10^{-13}$ | -               | intergenic variant                      |
| 6   | rs1577631  | 6:61237979    | A          | 0.611    | 0.043  | 0.01584                | $3.03 \times 10^{-26}$ | -               | intergenic variant                      |
| 6   | rs1855933  | 6:61571349    | A          | 0.610    | 0.040  | 0.02242                | $1.03 \times 10^{-47}$ | <i>MTRNR2L9</i> | upstream gene variant                   |
| 8   | rs6471717  | 8:58464798    | A          | 0.655    | -0.108 | $8.84 \times 10^{-09}$ | $9.30 \times 10^{-09}$ | -               | intergenic variant                      |
| 11  | rs1462565  | 11:23502288   | A          | 0.015    | 0.327  | $4.10 \times 10^{-06}$ | $4.06 \times 10^{-06}$ | -               | intergenic variant                      |
| 12  | rs11061712 | 12:1367741    | A          | 0.422    | -0.082 | $2.74 \times 10^{-06}$ | $2.80 \times 10^{-06}$ | <i>ERC1</i>     | intron variant                          |
| 12  | rs2277368  | 12:53714444   | C          | 0.313    | 0.096  | $6.56 \times 10^{-07}$ | $6.60 \times 10^{-07}$ | <i>CALCOCO1</i> | intron variant                          |
| 16  | rs11644920 | 16:11551157   | A          | 0.687    | -0.097 | $1.80 \times 10^{-07}$ | $1.90 \times 10^{-07}$ | <i>LITAF</i>    | intron variant                          |
| 16  | rs2216730  | 16:78799555   | T          | 0.840    | -0.118 | $1.56 \times 10^{-06}$ | $1.53 \times 10^{-06}$ | <i>WWOX</i>     | intron variant                          |
| 18  | rs12605943 | 18:48137422   | A          | 0.366    | -0.101 | $4.89 \times 10^{-06}$ | $5.12 \times 10^{-06}$ | <i>ZBTB7C</i>   | upstream gene variant                   |
| 19  | rs296391   | 19:47865277   | T          | 0.844    | 0.168  | $1.59 \times 10^{-10}$ | $1.54 \times 10^{-10}$ | -               | intergenic variant                      |
| 21  | rs9979307  | 21:35635881   | A          | 0.872    | -0.134 | $6.26 \times 10^{-07}$ | $6.11 \times 10^{-07}$ | -               | intergenic variant                      |

Annotations were obtained from UCSC variant annotation integrator genome.ucsc.edu

Nominally significant = 10Mb windows around SNPs with  $P < 5 \times 10^{-6}$

**Supplementary Table 3a. Imputation quality scores<sup>a</sup> in each study of SNPs associated with gallstone disease in discovery sets.**

| SNP        | ARIC study | Rotterdam study | SPC2 study | Framingham study | WGHS study | SHIP study | SHIP TREND study | BioVU study | NHS-HPFS Illumina | NHS-HPFS Affy |
|------------|------------|-----------------|------------|------------------|------------|------------|------------------|-------------|-------------------|---------------|
| rs4245791  | 0.98       | 1.00            | 0.83       | 0.89             | 1.00       | 0.98       | 1.00             | 1.00        | 0.99              | 1.00          |
| rs1025447  | 0.99       | 1.00            | 1.00       | 1.00             | 1.00       | 0.99       | 0.99             | 1.00        | 1.00              | 0.99          |
| rs9843304  | 0.96       | 1.00            | 0.88       | 1.00             | 0.99       | 0.97       | 0.99             | 1.00        | 1.00              | 0.98          |
| rs1260326  | 0.98       | 0.96            | 0.91       | 0.99             | 0.98       | 0.98       | 0.98             | 1.00        | 1.00              | 0.97          |
| rs2547231  | 0.87       | 1.00            | 0.80       | 1.01             | 1.00       | 0.81       | 1.00             | 1.00        | 1.00              | 0.69          |
| rs6471717  | 1.00       | Not imputed     | 1.00       | 0.98             | 0.98       | 0.99       | 0.99             | 0.99        | 0.99              | 0.99          |
| rs11887534 | 0.92       | 1.00            | 0.72       | 0.40             | 1.00       | 0.95       | 0.98             | 0.97        | 0.96              | 0.86          |

<sup>a</sup>Imputation quality scores were obtained using MaCH software in ARIC, Rotterdam, Framingham, WGHS, SHIP, SHIP-TREND and NHS/HPFS studies. Imputation quality scores in SPC2 and BioVU were obtained using IMPUTEv2.

**Supplementary Table 3b. Results of SNPs associated with gallstone disease in discovery sets after adjusting for BMI.**

| SNP                    | Hg38 / dbSNP 142 Location | Gene, variant                     | Risk allele | OR <sup>a</sup> | P-value                |
|------------------------|---------------------------|-----------------------------------|-------------|-----------------|------------------------|
| rs11887534             | chr2:43839108             | <i>ABCG8</i> , D19H               | C           | 1.72            | 7.74x10 <sup>-62</sup> |
| rs4245791 <sup>b</sup> | chr2:43847292             | <i>ABCG8</i> , intron             | T           | 1.26            | 8.79x10 <sup>-33</sup> |
| rs1025447              | chr2:43795831             | <i>DYNC2L1</i> , intron           | T           | 1.18            | 7.32x10 <sup>-12</sup> |
| rs9843304              | chr3:149493600            | <i>TM4SF4</i> , intron            | C           | 1.12            | 2.41x10 <sup>-11</sup> |
| rs1260326              | chr2:27508073             | <i>GCKR</i> , P446L               | C           | 1.12            | 1.39x10 <sup>-09</sup> |
| rs2547231 <sup>c</sup> | chr19:47881800            | <i>SULT2A1</i> , intron           | A           | 1.18            | 1.00x10 <sup>-10</sup> |
| rs6471717              | chr8:58464798             | <i>CYP7A1/UBXN2B</i> , intergenic | G           | 1.11            | 2.75x10 <sup>-09</sup> |

<sup>a</sup>OR = odds ratios. Odds ratio were adjusted for age, gender and BMI in each discovery study and for study specific additional covariates.

<sup>b</sup>Proxy SNP for rs4299376 ( $R^2 = 0.995$ ,  $D' = 0.999$  among 1,753 NHS participants )

<sup>c</sup>Proxy SNP for rs296391 ( $R^2 = 0.904$ ,  $D' = 0.969$  among 1,753 NHS participants)

**Supplementary Table 4. Discriminative accuracy of genetic risk score in the replication datasets.**

|                    | Odds ratio, per 1 standard deviation increase in GRS | AUC – Age, Sex and BMI | AUC – Age, Sex BMI and GRS |
|--------------------|------------------------------------------------------|------------------------|----------------------------|
| NHS/HPFS           | 1.33 (1.23, 1.43)                                    | 0.663                  | 0.679                      |
| Copenhagen cohorts | 1.35 (1.31, 1.40)                                    | 0.671                  | 0.691                      |
| Kiel case-control  | 1.50 (1.39, 1.61)                                    | 0.783                  | 0.798                      |

Footnote: Odds ratio estimates were adjusted for age, sex, and BMI at blood draw. GRS, genetic risk score; AUC, area under curve.

**Supplementary Table 5. *Post hoc* analysis in NHS and HPFS cohorts assuming dominant/ recessive modes of action for GWAS significant SNPs and genotype specific population attributable risk.**

| SNP        | Genotype         | All samples (Males and females) |                 |             |       | Females only |                 |                       |       | Males only |                 |             |      |
|------------|------------------|---------------------------------|-----------------|-------------|-------|--------------|-----------------|-----------------------|-------|------------|-----------------|-------------|------|
|            |                  | Ca/Co                           | OR (95% CI)     | p           | PAR%  | Ca/Co        | OR (95% CI)     | p                     | PAR%  | Ca/Co      | OR (95% CI)     | p           | PAR% |
| rs2547231  | CC               | 70/413                          | 1.0 Ref         |             |       | 54/250       | 1.0 Ref         |                       |       | 16/163     | 1.0 Ref         |             |      |
|            | CA               | 900/4021                        | 1.3(0.99,1.69)  | 0.0552      | 7.7   | 683/2461     | 1.28(0.94,1.73) | 0.119                 | 7.28  | 217/1560   | 1.35(0.77,2.35) | 0.29        | 8.76 |
|            | AA               | 2506/10030                      | 1.46(1.12,1.89) | 0.00451     | 24.2  | 1913/6063    | 1.45(1.08,1.96) | 0.0144                | 23.7  | 593/3967   | 1.47(0.85,2.52) | 0.165       | 24.7 |
|            | CC(ref) vs CA/AA |                                 | 1.41(1.09,1.83) | 0.00905     |       |              | 1.4(1.04,1.89)  | 0.0263                |       |            | 1.43(0.84,2.46) | 0.19        |      |
|            | CC/CA(ref) vs AA |                                 | 1.15(1.06,1.25) | 0.00121     |       |              | 1.16(1.05,1.28) | 0.00234               |       |            | 1.12(0.94,1.32) | 0.212       |      |
| rs1260326  | TT               | 586/2594                        | 1.0 Ref         |             |       | 414/1540     | 1.0 Ref         |                       |       | 172/1054   | 1.0 Ref         |             |      |
|            | TC               | 1630/7057                       | 1.02(0.92,1.13) | 0.71        | 0.966 | 1256/4283    | 1.09(0.96,1.23) | 0.197                 | 4.21  | 374/2774   | 0.81(0.66,1)    | 0.0454      | NA   |
|            | CC               | 1260/4813                       | 1.17(1.05,1.3)  | 0.00599     | 5.35  | 980/2951     | 1.23(1.08,1.4)  | 0.00196               | 7.18  | 280/1862   | 0.95(0.76,1.17) | 0.616       | NA   |
|            | TT(ref) vs TC/CC |                                 | 1.08(0.98,1.19) | 0.132       |       |              | 1.14(1.02,1.29) | 0.0257                |       |            | 0.86(0.72,1.05) | 0.134       |      |
|            | TT/TC(ref) vs CC |                                 | 1.15(1.06,1.24) | 0.000454    |       |              | 1.16(1.06,1.27) | 0.00175               |       |            | 1.1(0.93,1.29)  | 0.273       |      |
| rs11887534 | GG               | 2827/12824                      | 1.0 Ref         |             |       | 2160/7848    | 1.0 Ref         |                       |       | 667/4976   | 1.0 Ref         |             |      |
|            | GC               | 616/1577                        | 1.78(1.61,1.98) | 0           | 7.84  | 467/887      | 1.92(1.7,2.17)  | <10 <sup>-10</sup>    | 8.51  | 149/690    | 1.64(1.34,2.02) | 0.00000254  | 7.2  |
|            | CC               | 33/63                           | 2.45(1.6,3.76)  | 0.0000385   | 0.628 | 23/39        | 2.12(1.26,3.56) | 0.00442               | 0.495 | 10/12      | 3.43(1.59,7.4)  | 0.0017      | 1.01 |
|            | GG(ref) vs GC/CC |                                 | 1.81(1.64,2)    | 0           |       |              | 1.93(1.71,2.17) | <10 <sup>-10</sup>    |       |            | 1.71(1.39,2.09) | 0.000000214 |      |
|            | GG/GC(ref) vs CC |                                 | 2.26(1.48,3.46) | 0.00018     |       |              | 1.94(1.16,3.26) | 0.012                 |       |            | 3.19(1.48,6.87) | 0.00311     |      |
| rs4245791  | CC               | 303/1516                        | 1.0 Ref         |             |       | 233/971      | 1.0 Ref         |                       |       | 70/545     | 1.0 Ref         |             |      |
|            | CT               | 1445/6467                       | 1.13(0.99,1.3)  | 0.0794      | 5.49  | 1086/3956    | 1.15(0.98,1.35) | 0.0819                | 6.33  | 359/2511   | 1.18(0.88,1.57) | 0.267       | 7.36 |
|            | TT               | 1728/6481                       | 1.35(1.18,1.55) | 0.0000144   | 13.6  | 1331/3847    | 1.45(1.24,1.69) | 0.00000326            | 16.5  | 397/2634   | 1.24(0.93,1.65) | 0.146       | 10   |
|            | CC(ref) vs CT/TT |                                 | 1.24(1.09,1.41) | 0.00122     |       |              | 1.3(1.12,1.51)  | 0.000674              |       |            | 1.21(0.92,1.59) | 0.18        |      |
|            | CC/CT(ref) vs TT |                                 | 1.22(1.13,1.32) | 0.000000171 |       |              | 1.29(1.18,1.41) | 7.88x10 <sup>-9</sup> |       |            | 1.08(0.93,1.26) | 0.327       |      |
| rs9843304  | TT               | 932/4381                        | 1.0 Ref         |             |       | 731/2684     | 1.0 Ref         |                       |       | 201/1697   | 1.0 Ref         |             |      |
|            | TC               | 1717/7061                       | 1.13(1.04,1.24) | 0.00603     | 5.97  | 1305/4325    | 1.11(1,1.22)    | 0.0565                | 5.14  | 412/2736   | 1.24(1.03,1.49) | 0.0265      | 10.3 |
|            | CC               | 827/3022                        | 1.28(1.16,1.43) | 0.00000349  | 5.53  | 614/1765     | 1.27(1.13,1.44) | 0.00011               | 5.15  | 213/1257   | 1.42(1.15,1.76) | 0.00138     | 8.49 |
|            | TT(ref) vs TC/CC |                                 | 1.18(1.08,1.28) | 0.000127    |       |              | 1.15(1.05,1.27) | 0.00361               |       |            | 1.3(1.09,1.55)  | 0.00406     |      |



|           |                  |           |                 |         |      |           |                 |          |      |          |                 |        |      |
|-----------|------------------|-----------|-----------------|---------|------|-----------|-----------------|----------|------|----------|-----------------|--------|------|
|           | TT/TC(ref) vs CC |           | 1.19(1.09,1.3)  | 0.00016 |      |           | 1.2(1.08,1.33)  | 0.000723 |      |          | 1.24(1.04,1.48) | 0.0168 |      |
| rs6471717 | AA               | 1447/6332 | 1.0 Ref         |         |      | 1109/3847 | 1.0 Ref         |          |      | 338/2485 | 1.0 Ref         |        |      |
|           | AG               | 1555/6417 | 1.07(0.99,1.16) | 0.0984  | 3.01 | 1178/3864 | 1.06(0.97,1.16) | 0.217    | 2.57 | 377/2553 | 1.14(0.96,1.34) | 0.129  | 5.91 |
|           | GG               | 474/1715  | 1.22(1.08,1.37) | 0.00118 | 2.54 | 363/1063  | 1.18(1.03,1.35) | 0.018    | 2.13 | 111/652  | 1.32(1.03,1.68) | 0.0261 | 3.54 |
|           | AA(ref) vs AG/GG |           | 1.1(1.02,1.19)  | 0.013   |      |           | 1.09(0.99,1.19) | 0.0649   |      |          | 1.17(1,1.37)    | 0.0455 |      |
|           | AA/AG(ref) vs GG |           | 1.17(1.05,1.31) | 0.00436 |      |           | 1.14(1.01,1.3)  | 0.0387   |      |          | 1.23(0.98,1.55) | 0.0699 |      |

**Supplementary Table 6. *Post hoc* analysis in NHS and HPFS cohorts: Haplotype Analyses at the ABCG5/8 locus in relation to gallstone disease risk.**

| rs11887534(G/C*)<br>-rs4245791(C/T*)<br>Haplotype combinations | All samples (Males and females) |                 |                    |      | Females only |                 |                    |       | Males only |                 |         |      |
|----------------------------------------------------------------|---------------------------------|-----------------|--------------------|------|--------------|-----------------|--------------------|-------|------------|-----------------|---------|------|
|                                                                | Ca/Co                           | OR (95% CI)     | p                  | PAR% | Ca/Co        | OR (95% CI)     | p                  | PAR%  | Ca/Co      | OR (95% CI)     | p       | PAR% |
| G-C/ G-C                                                       | 302/1510                        | 1.0 Ref         |                    |      | 233/968      | 1.0 Ref         |                    |       | 69/542     | 1.0 Ref         |         |      |
| G-C/ G-T                                                       | 1255/5932                       | 1.07(0.93,1.23) | 0.369              | 2.79 | 941/3626     | 1.08(0.92,1.27) | 0.327              | 3.2   | 314/2306   | 1.11(0.83,1.49) | 0.466   | 4.27 |
| G-T/ G-T                                                       | 1270/5382                       | 1.19(1.03,1.37) | 0.0148             | 6.61 | 986/3254     | 1.27(1.08,1.48) | 0.00394            | 9.1   | 284/2128   | 1.08(0.81,1.45) | 0.597   | 2.91 |
| G-C/ C-T                                                       | 189/535                         | 1.79(1.45,2.21) | 4.58E-08           | 2.84 | 144/330      | 1.84(1.44,2.35) | 0.000000867        | 3.06  | 45/205     | 1.83(1.19,2.82) | 0.00611 | 2.9  |
| G-T/ C-T                                                       | 426/1036                        | 2.09(1.76,2.47) | <10 <sup>-10</sup> | 7.24 | 323/554      | 2.43(1.99,2.96) | <10 <sup>-10</sup> | 8.28  | 103/482    | 1.78(1.26,2.52) | 0.00114 | 6.2  |
| C-T/ C-T                                                       | 32/63                           | 2.64(1.69,4.13) | 0.000021           | 0.71 | 22/39        | 2.33(1.36,4.01) | 0.00221            | 0.588 | 10/24      | 3.73(1.66,8.38) | 0.00142 | 1.14 |

**Supplementary Table 7. *Post hoc* analysis in NHS and HPFS cohorts: Gene-gene interactions (GxG) between GWAS significant SNPs.**

| GxG<br>P-values                                                                       | SNP       | Upper triangle: Interaction P-values in the HPFS study (males). |           |           |           |           |
|---------------------------------------------------------------------------------------|-----------|-----------------------------------------------------------------|-----------|-----------|-----------|-----------|
|                                                                                       |           | rs1260326                                                       | rs4245791 | rs9843304 | rs6471717 | rs2547231 |
| Lower<br>triangle:<br>Interaction<br>P-values<br>in the<br>NHS<br>study<br>(females). | rs1260326 | -                                                               | 0.041     | 0.899     | 0.406     | 0.103     |
|                                                                                       | rs4245791 | 0.625                                                           | -         | 0.808     | 0.781     | 0.848     |
|                                                                                       | rs9843304 | 0.448                                                           | 0.305     | -         | 0.323     | 0.927     |
|                                                                                       | rs6471717 | 0.727                                                           | 0.883     | 0.737     | -         | 0.560     |
|                                                                                       | rs2547231 | 0.414                                                           | 0.526     | 0.831     | 0.058     | -         |

**Supplementary Table 8. *Post hoc* analysis in NHS and HPFS cohorts of GWAS significant SNPs after adjusting for potentially confounding medication use.**

| SNP        | Association in overall GWAS (age and sex adjusted) | Association in the NHS study (age and BMI adjusted) | Association in NHS after adjustment for age, BMI and history of self reported hypercholesterolemia | Association in NHS after adjustment for age, BMI and cholesterol lowering drug use | Association in NHS study after adjusting for age and post-menopausal hormone use | Association in the HPFS study (age and BMI adjusted) | Association in the HPFS study after adjusting for age, BMI and history of self reported hypercholesterolemia | Association in the HPFS study after adjusting for age, BMI and cholesterol lowering drug use |
|------------|----------------------------------------------------|-----------------------------------------------------|----------------------------------------------------------------------------------------------------|------------------------------------------------------------------------------------|----------------------------------------------------------------------------------|------------------------------------------------------|--------------------------------------------------------------------------------------------------------------|----------------------------------------------------------------------------------------------|
| rs11887534 | 1.78<br>(1.70, 1.86)                               | 1.94<br>[1.73-2.19]                                 | 1.97<br>[1.75-2.22]                                                                                | 1.95<br>[1.73-2.19]                                                                | 1.96<br>[1.74-2.22]                                                              | 1.76<br>[1.44-2.14]                                  | 1.76<br>[1.45-2.15]                                                                                          | 1.76<br>[1.45-2.14]                                                                          |
| rs4245791  | 1.28<br>(1.25, 1.32)                               | 1.23<br>[1.15-1.32]                                 | 1.24<br>[1.15-1.33]                                                                                | 1.23<br>[1.15-1.32]                                                                | 1.23<br>[1.15-1.32]                                                              | 1.08<br>[0.96-1.21]                                  | 1.08<br>[0.96-1.22]                                                                                          | 1.08<br>[0.96-1.22]                                                                          |
| rs9843304  | 1.11<br>(1.08, 1.14)                               | 1.14<br>[1.07-1.22]                                 | 1.14<br>[1.07-1.22]                                                                                | 1.14<br>[1.07-1.22]                                                                | 1.14<br>[1.07-1.21]                                                              | 1.19<br>[1.07-1.33]                                  | 1.19<br>[1.07-1.33]                                                                                          | 1.19<br>[1.07-1.33]                                                                          |
| rs1260326  | 1.12<br>(1.09, 1.15)                               | 1.11<br>[1.04-1.19]                                 | 1.12<br>[1.05-1.19]                                                                                | 1.11<br>[1.04-1.19]                                                                | 1.11<br>[1.04-1.19]                                                              | 0.99<br>[0.89-1.11]                                  | 0.99<br>[0.89-1.11]                                                                                          | 0.99<br>[0.89-1.11]                                                                          |
| rs2547231  | 1.17<br>(1.13, 1.22)                               | 1.18<br>[1.08-1.3]                                  | 1.19<br>[1.08-1.30]                                                                                | 1.18<br>[1.08-1.30]                                                                | 1.19<br>[1.08-1.31]                                                              | 1.11<br>[0.94-1.31]                                  | 1.11<br>[0.94-1.31]                                                                                          | 1.11<br>[0.94-1.31]                                                                          |
| rs6471717  | 1.11<br>(1.08, 1.14)                               | 1.08<br>[1.02-1.16]                                 | 1.08<br>[1.01-1.15]                                                                                | 1.08<br>[1.02-1.16]                                                                | 1.09<br>[1.02-1.16]                                                              | 1.15<br>[1.02-1.29]                                  | 1.15<br>[1.02-1.28]                                                                                          | 1.15<br>[1.02-1.28]                                                                          |

**Supplementary Table 9. *Post hoc* analysis in NHS and HPFS cohorts: Association of previously reported UGT1A1 SNP rs6742078.**

| SNP       | Genotype         | All samples (Males and females) |                  |         |       | Females only |                  |        |       | Males only |                  |         |      |
|-----------|------------------|---------------------------------|------------------|---------|-------|--------------|------------------|--------|-------|------------|------------------|---------|------|
|           |                  | Ca/Co                           | OR (95% CI)      | p       | PAR%  | Ca/Co        | OR (95% CI)      | p      | PAR%  | Ca/Co      | OR (95% CI)      | p       | PAR% |
| rs6742078 | GG               | 1538/6614                       | 1.0 Ref          |         |       | 1186/3988    | 1.0 Ref          |        |       | 352/2626   | 1.0 Ref          |         |      |
|           | GT               | 1521/6372                       | 1.02 (0.94,1.11) | 0.577   | 0.873 | 1157/3887    | 1.01 (0.92,1.1)  | 0.902  | 0.441 | 364/2485   | 1.08 (0.91,1.27) | 0.368   | 3.38 |
|           | TT               | 417/1478                        | 1.22 (1.08,1.38) | 0.00145 | 2.2   | 307/899      | 1.16 (1,1.34)    | 0.0498 | 1.61  | 110/579    | 1.45 (1.14,1.85) | 0.00284 | 4.38 |
|           | GG(ref) vs GT/TT |                                 | 1.06 (0.98,1.14) | 0.128   |       |              | 1.03 (0.95,1.13) | 0.453  |       |            | 1.15 (0.98,1.34) | 0.0813  |      |
|           | GG/GT(ref) vs TT |                                 | 1.21 (1.08,1.36) | 0.0015  |       |              | 1.15 (1.00,1.32) | 0.0428 |       |            | 1.39 (1.11,1.75) | 0.00433 |      |

### Supplementary Table 10. Concordant *cis*-eQTLs at gallstone GWAS susceptibility loci.

All eQTL results ( $P < 1.0E-05$ ) for Gallstone main Index and Replication SNPs are shown that display concordance between Index, gallstone-selected eSNP, and best known eSNP. Concordance was defined as either the same SNP or SNPs where all three pairwise relationship with  $r^2 > 0.8$  in HapMap CEU populations as defined by querying SNAP (<http://www.broadinstitute.org/mpg/snap/>).

| Index SNP | Locus label        | SNLabel     | Esnp       | Esnp <> Index (r^2) | eSNP.p   | Tissue                          | eQTL Transcript | Index <> Best Esnp (r^2) | Esnp <> Best Esnp (r^2) | Best Esnp  | Best eQTL.p          |
|-----------|--------------------|-------------|------------|---------------------|----------|---------------------------------|-----------------|--------------------------|-------------------------|------------|----------------------|
| rs1025447 | ABCG5/8 + DYNC2LI1 | Main        | rs1025447  | 1                   | 4.99E-10 | Omental adipose                 | ABCG8           | SameSNP                  | SameSNP                 | rs1025447  | 4.99E-10             |
|           |                    |             |            |                     | 1.18E-06 | Subcutaneous adipose            | ABCG8           | SameSNP                  | SameSNP                 | rs1025447  | 1.18E-06             |
| rs9843304 | TM4SF4             | Main        | rs12633863 | 1                   | 2.83E-09 | Liver [PMID 21602305]           | TM4SF4          | SameSNP                  | 0.967                   | rs12633863 | 2.83E-09             |
|           |                    |             |            |                     | 0.966    | Liver [PMID 21637794]           | TM4SF4          | SameSNP                  | 0.9                     | rs6774253  | 2.98E-06             |
| rs1260326 | GCKR               | Main        | rs1260326  | 1                   | 1.45E-09 | Liver [PMID 21602305]           | C2orf16         | SameSNP                  | SameSNP                 | rs1260326  | 1.45E-09             |
| rs296381  | SULT2A1            | Main        | rs2547231  | 0.945               | 1.14E-55 | Cerebellum (all samples)        | SULT2A1         | SameSNP                  | 0.866                   | rs2547231  | 1.14E-55             |
|           |                    |             |            |                     | 2.07E-54 | Liver [PMID 21602305]           | SULT2A1         | SameSNP                  | 0.866                   | rs2547231  | 2.07E-54             |
|           |                    |             |            |                     | 3.56E-26 | Cerebellum (Alzheimer's)        | SULT2A1         | SameSNP                  | 0.866                   | rs2547231  | 3.56E-26             |
|           |                    |             |            |                     | 7.07E-24 | Visual cortex (all samples)     | SULT2A1         | SameSNP                  | 0.866                   | rs2547231  | 7.07E-24             |
|           |                    |             |            |                     | 6.25E-20 | Prefrontal cortex (all samples) | SULT2A1         | SameSNP                  | 0.866                   | rs2547231  | 6.25E-20             |
|           |                    |             |            |                     | 3.64E-16 | Cerebellum (Huntington's)       | SULT2A1         | SameSNP                  | 0.866                   | rs2547231  | 3.64E-16             |
|           |                    |             |            |                     | 1.14E-14 | Cerebellum (normal samples)     | SULT2A1         | SameSNP                  | 0.866                   | rs2547231  | 1.14E-14             |
|           |                    |             |            |                     | 2.16E-11 | Liver [PMID 18462017]           | SULT2A1         | SameSNP                  | 0.866                   | rs2547231  | 2.16E-11             |
|           |                    |             |            |                     | 1.50E-09 | Visual cortex (Alzheimer's)     | SULT2A1         | SameSNP                  | 0.866                   | rs2547231  | 1.50E-09             |
|           |                    |             |            |                     | 1.29E-08 | Prefrontal cortex (Alzheimer's) | SULT2A1         | SameSNP                  | 0.866                   | rs2547231  | 1.29E-08             |
|           |                    |             |            |                     | 3.03E-08 | Visual cortex (Huntington's)    | SULT2A1         | SameSNP                  | 0.866                   | rs2547231  | 3.03E-08             |
|           |                    |             |            |                     | 3.30E-06 | Visual cortex (normal samples)  | SULT2A1         | SameSNP                  | 0.866                   | rs2547231  | 3.30E-06             |
|           |                    |             |            |                     |          |                                 |                 | rs296391                 | 0.972                   | 2.00E-16   | Lung [PMID 23209423] |
| rs2547231 | SULT2A1            | Replication | rs2547231  | 1                   | 1.14E-55 | Cerebellum (all samples)        | SULT2A1         | SameSNP                  | SameSNP                 | rs2547231  | 1.14E-55             |
|           |                    |             |            |                     | 2.07E-54 | Liver [PMID 21602305]           | SULT2A1         | SameSNP                  | SameSNP                 | rs2547231  | 2.07E-54             |

|            |       |      |            |       |          |                                 |         |         |         |            |          |
|------------|-------|------|------------|-------|----------|---------------------------------|---------|---------|---------|------------|----------|
|            |       |      |            |       | 3.56E-26 | Cerebellum (Alzheimer's)        | SULT2A1 | SameSNP | SameSNP | rs2547231  | 3.56E-26 |
|            |       |      |            |       | 7.07E-24 | Visual cortex (all samples)     | SULT2A1 | SameSNP | SameSNP | rs2547231  | 7.07E-24 |
|            |       |      |            |       | 6.25E-20 | Prefrontal cortex (all samples) | SULT2A1 | SameSNP | SameSNP | rs2547231  | 6.25E-20 |
|            |       |      |            |       | 3.64E-16 | Cerebellum (Huntington's)       | SULT2A1 | SameSNP | SameSNP | rs2547231  | 3.64E-16 |
|            |       |      |            |       | 1.14E-14 | Cerebellum (normal samples)     | SULT2A1 | SameSNP | SameSNP | rs2547231  | 1.14E-14 |
|            |       |      |            |       | 2.16E-11 | Liver [PMID 18462017]           | SULT2A1 | SameSNP | SameSNP | rs2547231  | 2.16E-11 |
|            |       |      |            |       | 1.50E-09 | Visual cortex (Alzheimer's)     | SULT2A1 | SameSNP | SameSNP | rs2547231  | 1.50E-09 |
|            |       |      |            |       | 1.29E-08 | Prefrontal cortex (Alzheimer's) | SULT2A1 | SameSNP | SameSNP | rs2547231  | 1.29E-08 |
|            |       |      |            |       | 3.03E-08 | Visual cortex (Huntington's)    | SULT2A1 | SameSNP | SameSNP | rs2547231  | 3.03E-08 |
|            |       |      |            |       | 3.30E-06 | Visual cortex (normal samples)  | SULT2A1 | SameSNP | SameSNP | rs2547231  | 3.30E-06 |
|            |       |      | rs296391   | 0.917 | 2.00E-16 | Lung [PMID 23209423]            | SULT2A1 | SameSNP | 0.799   | rs296391   | 2.00E-16 |
| rs11644920 | LITAF | Main | rs11074995 | 0.957 | 1.54E-38 | Subcutaneous adipose            | LITAF   | 0.955   | 1       | rs3784924  | 2.37E-42 |
|            |       |      |            |       | 1.90E-12 | Liver [PMID 18462017]           | LITAF   | SameSNP | 0.955   | rs11074995 | 1.90E-12 |
|            |       |      |            |       | 7.83E-06 | Subcutaneous adipose            | SNN     | 0.955   | SameSNP | rs11644920 | 2.55E-06 |
|            |       |      | rs11074996 | 0.957 | 1.48E-38 | Subcutaneous adipose            | LITAF   | 0.955   | 1       | rs3784924  | 2.37E-42 |
|            |       |      |            |       | 7.90E-06 | Subcutaneous adipose            | SNN     | 0.955   | SameSNP | rs11644920 | 2.55E-06 |
|            |       |      | rs11644920 | 1     | 3.70E-42 | Subcutaneous adipose            | LITAF   | 1       | 1       | rs3784924  | 2.37E-42 |
|            |       |      |            |       | 2.55E-06 | Subcutaneous adipose            | SNN     | SameSNP | SameSNP | rs11644920 | 2.55E-06 |
|            |       |      | rs12595973 | 0.957 | 6.61E-38 | Subcutaneous adipose            | LITAF   | 0.955   | 1       | rs3784924  | 2.37E-42 |
|            |       |      |            |       | 8.85E-22 | Prefrontal cortex (all samples) | LITAF   | SameSNP | 0.955   | rs12595973 | 8.85E-22 |
|            |       |      |            |       | 4.17E-12 | Prefrontal cortex (Alzheimer's) | LITAF   | SameSNP | 0.955   | rs12595973 | 4.17E-12 |
|            |       |      | rs12596176 | 0.957 | 4.78E-39 | Subcutaneous adipose            | LITAF   | 0.955   | 1       | rs3784924  | 2.37E-42 |
|            |       |      | rs3784924  | 1     | 4.53E-47 | Subcutaneous adipose            | LITAF   | SameSNP | 1       | rs3784924  | 4.53E-47 |
|            |       |      |            |       | 2.37E-42 | Subcutaneous adipose            | LITAF   | SameSNP | 1       | rs3784924  | 2.37E-42 |
|            |       |      |            |       | 9.34E-42 | Omental adipose                 | LITAF   | SameSNP | 1       | rs3784924  | 9.34E-42 |
|            |       |      |            |       | 1.00E-16 | Liver [PMID 21637794]           | LITAF   | SameSNP | 1       | rs3784924  | 1.00E-16 |
|            |       |      |            |       | 2.05E-13 | Visual cortex (all samples)     | LITAF   | SameSNP | 1       | rs3784924  | 2.05E-13 |

|  |  |  |            |       |          |                             |       |         |         |            |          |
|--|--|--|------------|-------|----------|-----------------------------|-------|---------|---------|------------|----------|
|  |  |  |            |       | 1.26E-10 | Visual cortex (Alzheimer's) | LITAF | SameSNP | 1       | rs3784924  | 1.26E-10 |
|  |  |  |            |       | 3.44E-08 | Liver [PMID 21637794]       | LITAF | SameSNP | 1       | rs3784924  | 3.44E-08 |
|  |  |  |            |       | 3.30E-06 | Subcutaneous adipose        | SNN   | 1       | SameSNP | rs11644920 | 2.55E-06 |
|  |  |  | rs57792815 | 0.868 | 1.20E-09 | Subcutaneous adipose        | LITAF | SameSNP | 0.868   | rs57792815 | 1.20E-09 |



**Supplementary Table 11. Regulatory annotations for gallstone SNPs with eQTL associations.**

All index and replication SNPs with concordant *cis*-eQTL associations (**Supplementary Table 5**) were queried against haploReg v.3.0 ([http://www.broadinstitute.org/mammals/haploreg/haploreg\\_v3.php](http://www.broadinstitute.org/mammals/haploreg/haploreg_v3.php)).

| rsID       | Gallstone eQTL | eQTL tissues      | Enhancer ENCODE | Enhancer Roadmap                                                                                       | DNAse                                                                                                                                     | Proteins | Motifs                                                             |
|------------|----------------|-------------------|-----------------|--------------------------------------------------------------------------------------------------------|-------------------------------------------------------------------------------------------------------------------------------------------|----------|--------------------------------------------------------------------|
| rs1025447  | ABCG8          | Adipose           | .               | .                                                                                                      | .                                                                                                                                         | .        | Foxj2_1;lrf_known10;lrf_known11;lrf_known5;lrf_known6;MIF-1;Nkx3_4 |
| rs1260326  | C2orf16        | Liver             | .               | LIV.A,9_TxEnhG1<br>H1.BMP4DT,12_EnhWk2<br>GAS,9_TxEnhG1                                                | AWG,HepG2                                                                                                                                 | .        | NRSF_known3                                                        |
| rs11074995 | LITAF          | Liver,<br>adipose | .               | BN.SN,14_Enh BN.ITL,14_Enh<br>CCIP.LSMPTP,14_Enh<br>PFM.1,11_EnhWk1<br>BN.CC,14_Enh<br>PFM.2,11_EnhWk1 | AWG,HMEC<br>AWG,HSMM<br>AWG,HSMMtube<br>Duke,pHTE<br>UW,HAepiC<br>UW,HAc<br>UW,HCFaa<br>UW,HEEpiC<br>UW,HFF-Myc<br>UW,HNPCEpiC<br>UW,PrEC | .        | .                                                                  |
| rs11074996 | LITAF          | Adipose           | .               | BN.SN,14_Enh BN.ITL,14_Enh<br>CCIP.LSMPTP,14_Enh<br>PFM.1,11_EnhWk1<br>BN.CC,14_Enh<br>PFM.2,11_EnhWk1 | .                                                                                                                                         | .        | HP1-site-factor;Hand1_1                                            |

|            |       |                             |               |                                                                                                                                                                                                                                  |                                                                                                                                                                                     |                                                                   |                                                                  |
|------------|-------|-----------------------------|---------------|----------------------------------------------------------------------------------------------------------------------------------------------------------------------------------------------------------------------------------|-------------------------------------------------------------------------------------------------------------------------------------------------------------------------------------|-------------------------------------------------------------------|------------------------------------------------------------------|
| rs11644920 | LITAF | Adipose                     | .             | CD15.P,9_TxEnhG1<br>ESO,14_Enh LIV.A,9_TxEnhG1<br>MSC.ADIPC,11_EnhWk1<br>R.MUC29,9_TxEnhG1<br>ADI.NUC,13_EnhA<br>BN.AG,14_Enh<br>DUO.MUC61,9_TxEnhG1<br>SK.MUS63,9_TxEnhG1<br>BN.CC,9_TxEnhG1<br>BN.AC,14_Enh<br>PFM.2,9_TxEnhG1 | AWG,A549<br>UW,AG09319<br>UW,HCF UW,HCM<br>UW,HCPEpiC<br>UW,HConF<br>UW,HGF<br>UW,HIPEpiC<br>UW,HL-60<br>UW,HMVEC-LLy<br>UW,HMVEC-dNeo<br>UW,HVMF<br>UW,Monocytes-<br>CD14+_RO01746 | .                                                                 | ATF2;Nanog_disc1                                                 |
| rs12595973 | LITAF | Adipose,<br>brain           | .             | ADI.NUC,11_EnhWk1<br>PFF.2,12_EnhWk2<br>KID.FE,12_EnhWk2<br>BN.FE0,12_EnhWk2                                                                                                                                                     | AWG,LNcaP<br>UW,HCPEpiC<br>UW,HPdLF                                                                                                                                                 | HepG2,MAFF,Stanford<br>HepG2,MAFK,Stanford<br>HepG2,MAFK,Stanford | GATA_known10;GATA_kno<br>wn9;HDAC2_disc1;HDAC2_<br>disc6;Smad3_2 |
| rs12596176 | LITAF | Adipose                     | H1,7_Weak_Enh | CCCRA.NP,11_EnhWk1<br>CC.TPC,12_EnhWk2<br>BR.H35,11_EnhWk1<br>CD4.NP,11_EnhWk1<br>IPS.18,11_EnhWk1<br>BR.MYO,11_EnhWk1<br>CD4.MP,12_EnhWk2<br>CD8.NP,11_EnhWk1                                                                   | AWG,HMEC<br>AWG,HeLa-S3<br>Duke,Fibrobl<br>UW,HEEpiC<br>UW,HMVEC-LLy<br>UW,Monocytes-<br>CD14+_RO01746<br>UW,PrEC UW,SAEC                                                           | MCF10A-Er-<br>Src,STAT3,Harvard(Weissman),TA<br>M_1uM_36hr        | SREBP_known1                                                     |
| rs3784924  | LITAF | Liver,<br>adipose,<br>brain | .             | CD15.P,9_TxEnhG1<br>ESO,14_Enh LIV.A,9_TxEnhG1<br>MSC.ADIPC,11_EnhWk1<br>R.MUC29,9_TxEnhG1<br>ADI.NUC,13_EnhA<br>BN.AG,14_Enh                                                                                                    | Duke,Fibrobl                                                                                                                                                                        | MCF10A-Er-<br>Src,STAT3,Harvard(Weissman),Et<br>OH_0.01pct_4hr    | GR_known1                                                        |

|            |         |              |                    |                                                                                                                                                                                                                                  |              |                                                                                                                                                                                                                                                                                                                                  |                             |
|------------|---------|--------------|--------------------|----------------------------------------------------------------------------------------------------------------------------------------------------------------------------------------------------------------------------------|--------------|----------------------------------------------------------------------------------------------------------------------------------------------------------------------------------------------------------------------------------------------------------------------------------------------------------------------------------|-----------------------------|
| rs57792815 | LITAF   | Adipose      | .                  | CD15.P,9_TxEnhG1<br>ESO,14_Enh LIV.A,9_TxEnhG1<br>MSC.ADIPC,11_EnhWk1<br>R.MUC29,9_TxEnhG1<br>ADI.NUC,13_EnhA<br>BN.AG,14_Enh<br>DUO.MUC61,9_TxEnhG1<br>SK.MUS63,9_TxEnhG1<br>BN.CC,9_TxEnhG1<br>BN.AC,14_Enh<br>PFM.2,9_TxEnhG1 | .            | .                                                                                                                                                                                                                                                                                                                                | NRSF_disc4;Sp4              |
| rs2547231  | SULT2A1 | Liver, brain | .                  | LIV.A,10_TxEnhG2                                                                                                                                                                                                                 | .            | .                                                                                                                                                                                                                                                                                                                                | Hand1_1;Smad3_2             |
| rs296391   | SULT2A1 | Lung         | .                  | HUES48,14_Enh<br>HUES6,14_Enh IPS.20,14_Enh<br>IPS.DF19,14_Enh H1,14_Enh<br>IPS.18,12_EnhWk2                                                                                                                                     | Duke,Osteobl | .                                                                                                                                                                                                                                                                                                                                | .                           |
| rs12633863 | TM4SF4  | Liver        | HepG2,4_Strong_Enh | IPS.DF19,14_Enh<br>IPS.DF6,11_EnhWk1<br>HUES48,12_EnhWk2<br>SK.MUS62,12_EnhWk2                                                                                                                                                   | AWG,HepG2    | HepG2,ELF1,HudsonAlpha<br>HepG2,FOXA1,HudsonAlpha<br>HepG2,FOXA1,HudsonAlpha<br>HepG2,HDAC2,HudsonAlpha<br>HepG2,HEY1,HudsonAlpha<br>HepG2,HNF4A,HudsonAlpha<br>HepG2,HNF4A,Stanford,forskolin<br>HepG2,HNF4G,HudsonAlpha<br>HepG2,P300,HudsonAlpha<br>HepG2,SP1,HudsonAlpha<br>HepG2,TAF1,HudsonAlpha<br>HepG2,USF1,HudsonAlpha | Foxa_known2;HDAC2_disc<br>6 |

|           |        |       |                                     |                                                                                                                                                                                                                                                                                 |                          |   |                |
|-----------|--------|-------|-------------------------------------|---------------------------------------------------------------------------------------------------------------------------------------------------------------------------------------------------------------------------------------------------------------------------------|--------------------------|---|----------------|
| rs6774253 | TM4SF4 | Liver | HepG2,4_Strong_Enh<br>H1,7_Weak_Enh | IPS.DF19,14_Enh<br>IPS.DF6,11_EnhWk1<br>HUES48,12_EnhWk2<br>SK.MUS62,12_EnhWk2<br>ES.I3,11_EnhWk1<br>NCC.GED2,12_EnhWk2<br>ADI.MSC,13_EnhA<br>R.SMUS,12_EnhWk2<br>H1,11_EnhWk1<br>ES.WA7,12_EnhWk2<br>DUO.SMUS,12_EnhWk2<br>BM.MSC,11_EnhWk1<br>BN.SN,14_Enh<br>PFF.1,11_EnhWk1 | Duke,Urothelia,UT<br>189 | . | CI2;Mef2_disc3 |
|-----------|--------|-------|-------------------------------------|---------------------------------------------------------------------------------------------------------------------------------------------------------------------------------------------------------------------------------------------------------------------------------|--------------------------|---|----------------|

**Supplementary Table 12. Results of querying gallstone SNPs and proxies ( $r^2 > 0.8$ ) in the GRASP GWAS database v. 2.0.**

| GallstoneProxy | GallstoneIndex | Distance | $r^2$ | D' | Chr | Gallstone candidate gene    | Pubmed ID | Results location | GWAS p-value | Trait                                                        |
|----------------|----------------|----------|-------|----|-----|-----------------------------|-----------|------------------|--------------|--------------------------------------------------------------|
| rs9921290      | rs1260326      | 0        | 1     | 1  | 2   | GCKR                        | 20686565  | Table S19        | 1.30E-139    | Triglycerides                                                |
| rs9843304      | rs4299376      | 1855     | 1     | 1  | 2   | ABCG8                       | 20529992  | Table 1          | 1.40E-72     | Serum phytosterol (sitosterol normalized to cholesterol)     |
| rs9500809      | rs4299376      | 0        | 1     | 1  | 2   | ABCG8                       | 20686565  | Table S19        | 2.30E-49     | LDL cholesterol                                              |
| rs9476368      | rs4299376      | 0        | 1     | 1  | 2   | ABCG8                       | 20686565  | Table S19        | 3.20E-47     | Total cholesterol                                            |
| rs9448882      | rs1260326      | 0        | 1     | 1  | 2   | GCKR                        | 23263486  | Table6Supp       | 1.25E-44     | Serum urate                                                  |
| rs9446581      | rs1260326      | 0        | 1     | 1  | 2   | GCKR                        | 23263486  | Table15Supp      | 3.80E-43     | C-reactive protein (CRP)                                     |
| rs9446578      | rs1260326      | 0        | 1     | 1  | 2   | GCKR                        | 22885924  | Table S3a        | 2.17E-41     | Fasting blood glucose                                        |
| rs9382866      | rs1260326      | 0        | 1     | 1  | 2   | GCKR                        | 19936222  | Table S1         | 6.30E-36     | HDL cholesterol total lipoprotein fraction concentration     |
| rs9352458      | rs1260326      | 0        | 1     | 1  | 2   | GCKR                        | 21676895  | Table 2          | 1.70E-28     | FVII                                                         |
| rs9352243      | rs1260326      | 0        | 1     | 1  | 2   | GCKR                        | 19936222  | Table S3         | 2.79E-28     | VLDL cholesterol large lipoprotein fraction concentration    |
| rs9352216      | rs1260326      | 0        | 1     | 1  | 2   | GCKR                        | 20686565  | Table S19        | 4.40E-28     | Total cholesterol                                            |
| rs9350568      | rs1260326      | 10297    | 0.933 | 1  | 2   | GCKR                        | 20081858  | Table 1          | 3.00E-24     | HOMA-IR                                                      |
| rs9343302      | rs1260326      | 0        | 1     | 1  | 2   | GCKR                        | 22885924  | Table S2e        | 2.74E-22     | Fasting insulin                                              |
| rs9341417      | rs1260326      | 0        | 1     | 1  | 2   | GCKR                        | 20081857  | Table S2         | 2.26E-21     | 2 hour glucose                                               |
| rs9294905      | rs1260326      | 0        | 1     | 1  | 2   | GCKR                        | 23022100  | Table S4         | 4.10E-19     | Serum albumin                                                |
| rs9294231      | rs296381       | 17900    | 0.941 | 1  | 19  | SULT2A1                     | 21533175  | Table S1         | 1.96E-18     | Serum dehydroepiandrosterone sulphate (DHEAS)                |
| rs9294080      | rs1260326      | 10297    | 0.933 | 1  | 2   | GCKR                        | 19936222  | Table S3         | 1.07E-17     | APOB assay lipoprotein fraction concentration                |
| rs8192870      | rs1260326      | 11663    | 0.932 | 1  | 2   | GCKR                        | 22829776  | Table 1          | 2.20E-16     | Sex hormone-binding globulin (SHBG) concentrations           |
| rs780094       | rs1260326      | 0        | 1     | 1  | 2   | GCKR                        | 20383146  | Table 2          | 3.00E-14     | Serum creatinine estimated glomerular filtration rate (eGFR) |
| rs780094       | rs6471717      | 65660    | 0.922 | 1  | 8   | Intergenic, close to CYP7A1 | 20686565  | Table S19        | 2.50E-13     | Total cholesterol                                            |

|          |            |       |       |   |   |                                   |          |           |          |                                                                                |
|----------|------------|-------|-------|---|---|-----------------------------------|----------|-----------|----------|--------------------------------------------------------------------------------|
| rs780094 | rs1260326  | 0     | 1     | 1 | 2 | GCKR                              | 22001757 | Table 1   | 3.90E-13 | Gamma-glutamyl transferase (GGT)                                               |
| rs780094 | rs1260326  | 10297 | 0.933 | 1 | 2 | GCKR                              | 19936222 | Table S1  | 9.80E-13 | LDL cholesterol mean size lipoprotein fraction concentration in fasting sample |
| rs780094 | rs1260326  | 11663 | 0.932 | 1 | 2 | GCKR                              | 21386085 | Table S6  | 1.90E-12 | Waist circumference and Triglycerides                                          |
| rs780094 | rs1260326  | 0     | 1     | 1 | 2 | GCKR                              | 19060906 | Table S7  | 8.70E-12 | APOC3 (apolipoprotein C-III)                                                   |
| rs780094 | rs1260326  | 10297 | 0.933 | 1 | 2 | GCKR                              | 21194676 | Table 1   | 2.20E-11 | Height (adults)                                                                |
| rs780094 | rs1260326  | 0     | 1     | 1 | 2 | GCKR                              | 19936222 | Table S3  | 2.87E-11 | APOA1 assay lipoprotein fraction concentration                                 |
| rs780094 | rs1260326  | 11663 | 0.932 | 1 | 2 | GCKR                              | 21102463 | Table 2   | 4.70E-11 | Crohn's disease                                                                |
| rs780094 | rs4299376  | 1305  | 1     | 1 | 2 | ABCG8                             | 23202125 | Table S9  | 2.76E-10 | Coronary artery disease (CAD)                                                  |
| rs780094 | rs1260326  | 11663 | 0.932 | 1 | 2 | GCKR                              | 21386085 | Table 2   | 3.00E-10 | Triglycerides and Blood pressure                                               |
| rs780094 | rs11887534 | 0     | 1     | 1 | 2 | ABCG8                             | 19936222 | Table S3  | 3.48E-10 | APOB assay lipoprotein fraction concentration                                  |
| rs780094 | rs1260326  | 10297 | 0.933 | 1 | 2 | GCKR                              | 19936222 | Table S3  | 6.98E-10 | IDL total lipoprotein fraction concentration                                   |
| rs780094 | rs1260326  | 0     | 1     | 1 | 2 | GCKR                              | 22139419 | Table 1   | 9.12E-10 | Platelet count (PLT)                                                           |
| rs780094 | rs1260326  | 11663 | 0.932 | 1 | 2 | GCKR                              | 23362303 | Table S3  | 9.80E-10 | Plasma palmitoleic acid                                                        |
| rs780094 | rs1260326  | 10297 | 0.933 | 1 | 2 | GCKR                              | 20081858 | Table 2   | 1.30E-09 | Type 2 diabetes                                                                |
| rs780094 | rs6471717  | 65660 | 0.922 | 1 | 8 | Intergenic,<br>close to<br>CYP7A1 | 20686565 | Table S19 | 1.90E-09 | LDL cholesterol                                                                |
| rs780094 | rs1260326  | 10297 | 0.933 | 1 | 2 | GCKR                              | 21829377 | Text      | 2.52E-09 | Plasma docosapentaenoic acid levels                                            |
| rs780094 | rs1025447  | 0     | 1     | 1 | 2 | DYNC2LI1                          | 20686565 | FullScan  | 2.76E-09 | LDL cholesterol                                                                |
| rs780093 | rs1260326  | 0     | 1     | 1 | 2 | GCKR                              | 23118302 | TableS2   | 9.40E-09 | Lipoprotein-associated phospholipase A2 mass (Lp-PLA2)                         |
| rs780093 | rs1025447  | 0     | 1     | 1 | 2 | DYNC2LI1                          | 20686565 | FullScan  | 1.13E-08 | Total cholesterol                                                              |
| rs780093 | rs1260326  | 10297 | 0.933 | 1 | 2 | GCKR                              | 21423719 | Table S5  | 2.59E-08 | Nonalcoholic fatty liver disease                                               |

GRASP database : (<http://apps.nhlbi.nih.gov/grasp/>).

**Supplementary Table 13. Results of querying gallstone SNPs and proxies ( $r^2 > 0.8$ ) in the atlas of genetic influences on human blood metabolites.**

| Locus and gene ID (Cytoband)             | SNP       | Biochemical(s)                                     | N     | EA/OA <sup>1</sup> | EAF <sup>2</sup> | Effect (SE)   | P-value   | eQTL | Reference (PMID)                                             |
|------------------------------------------|-----------|----------------------------------------------------|-------|--------------------|------------------|---------------|-----------|------|--------------------------------------------------------------|
| <u>136. <i>SULT2A1</i></u><br>(19q13.32) | rs2547231 | X-11440/ 4-androsten-3beta,17beta-diol disulfate 2 | 7,240 | A/C                | 0.83             | 0.141 (0.005) | 3.06E-191 | Yes  | 23093944                                                     |
| <u>15. <i>GCKR</i></u><br>(2p23.3)       | rs1260326 | glucose/ mannose                                   | 7,310 | T/C                | 0.41             | 0.041 (0.002) | 2.50E-148 | Yes  | 23362303;<br>23362303;<br>21829377;<br>21886157;<br>22286219 |

Data retrieved from: – PMID: 24816252 – An atlas of genetic influences on human blood metabolites Supplementary Table 4.

## Supplementary Figures

Supplementary Figure 1 Flow chart of study cohorts and methods in the discovery and replication stages

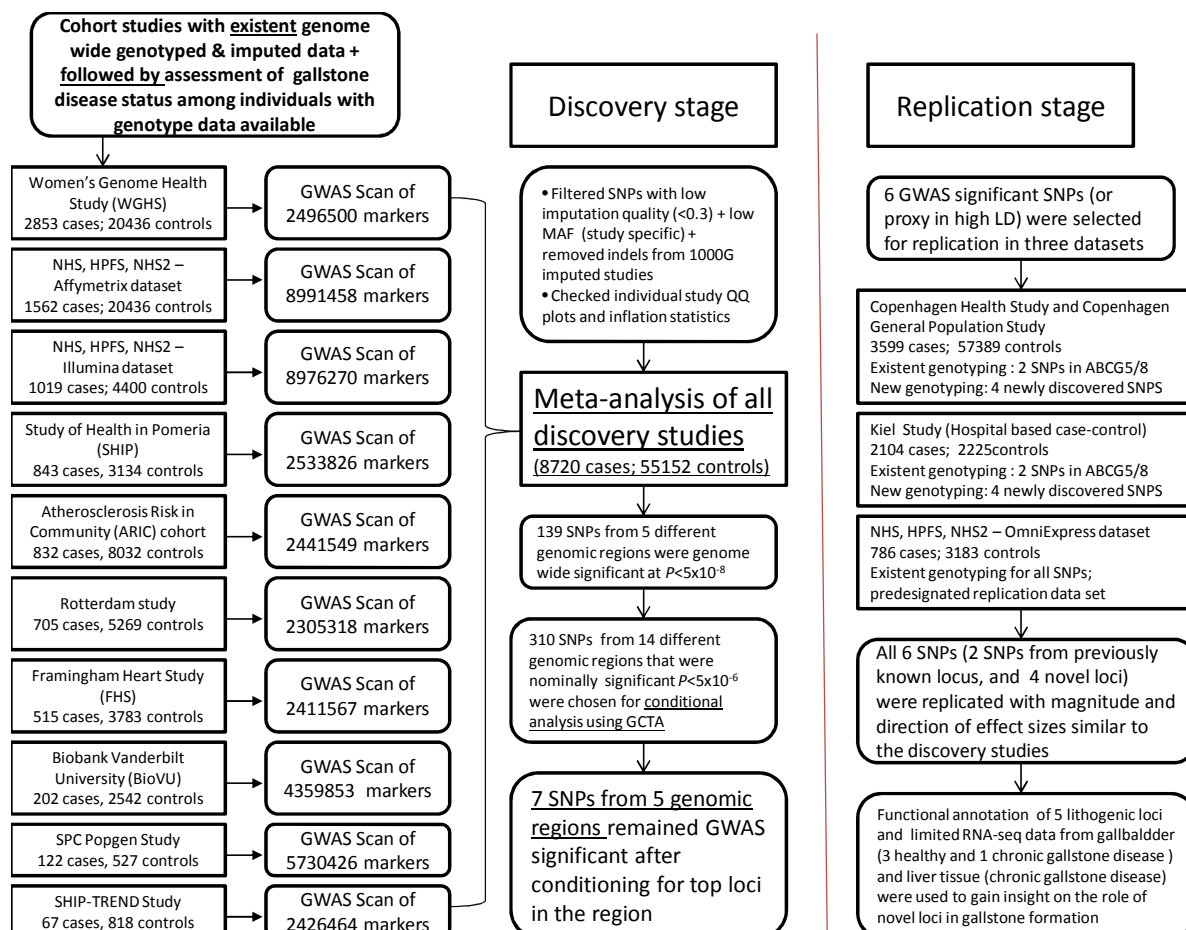



Supplementary Figure 2 Q-Q plot of gallstones disease GWAS meta-analysis.

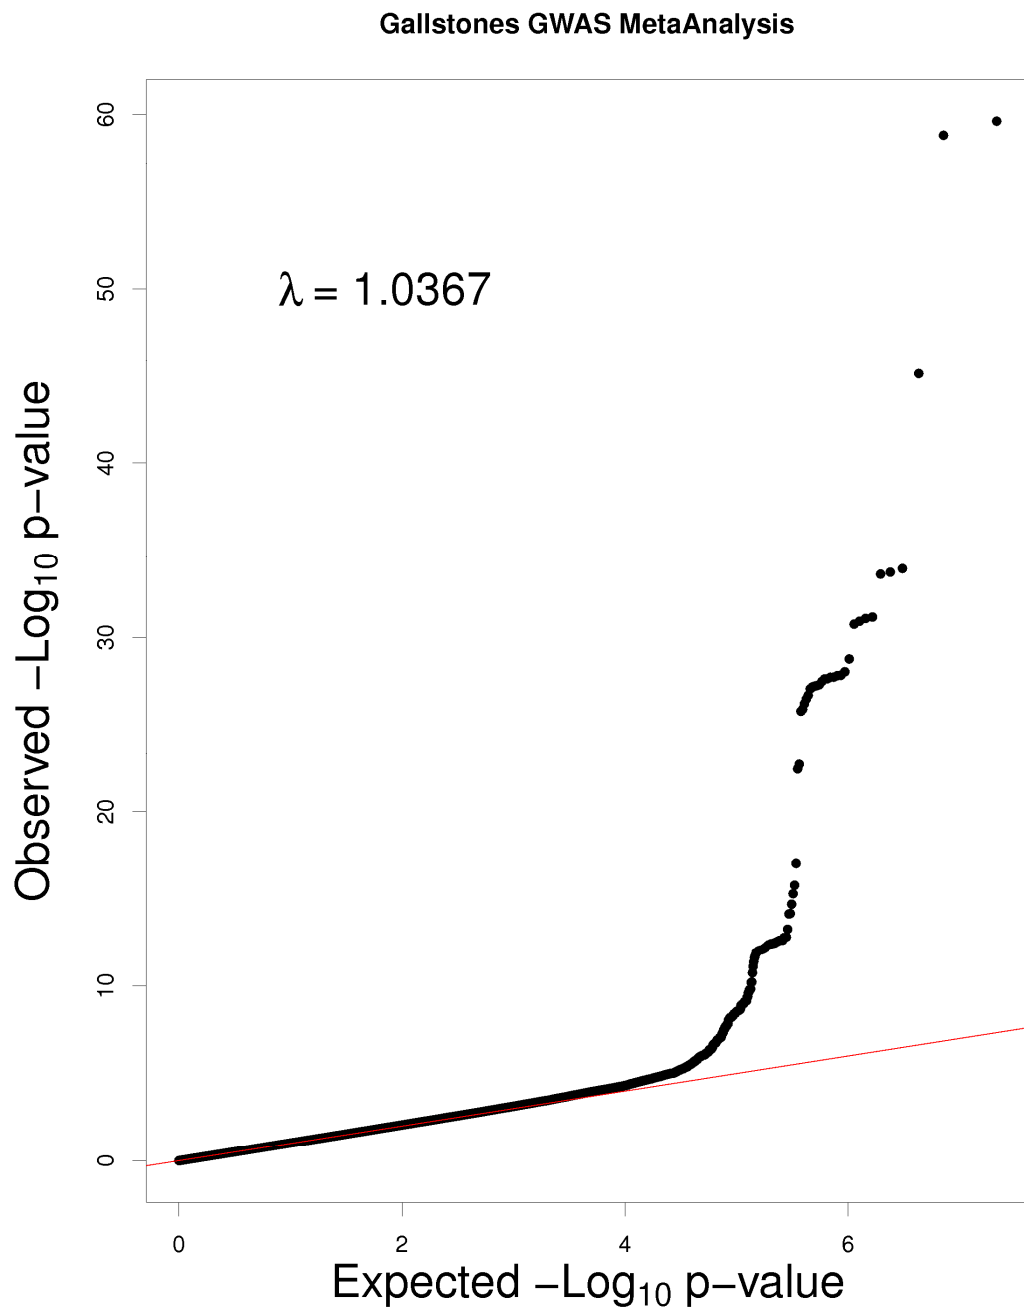

### Supplementary Figure 3 Regional association plots for discovered loci in GWAS meta-analysis.

#### Supplementary Figure 3A – ABCG8 locus

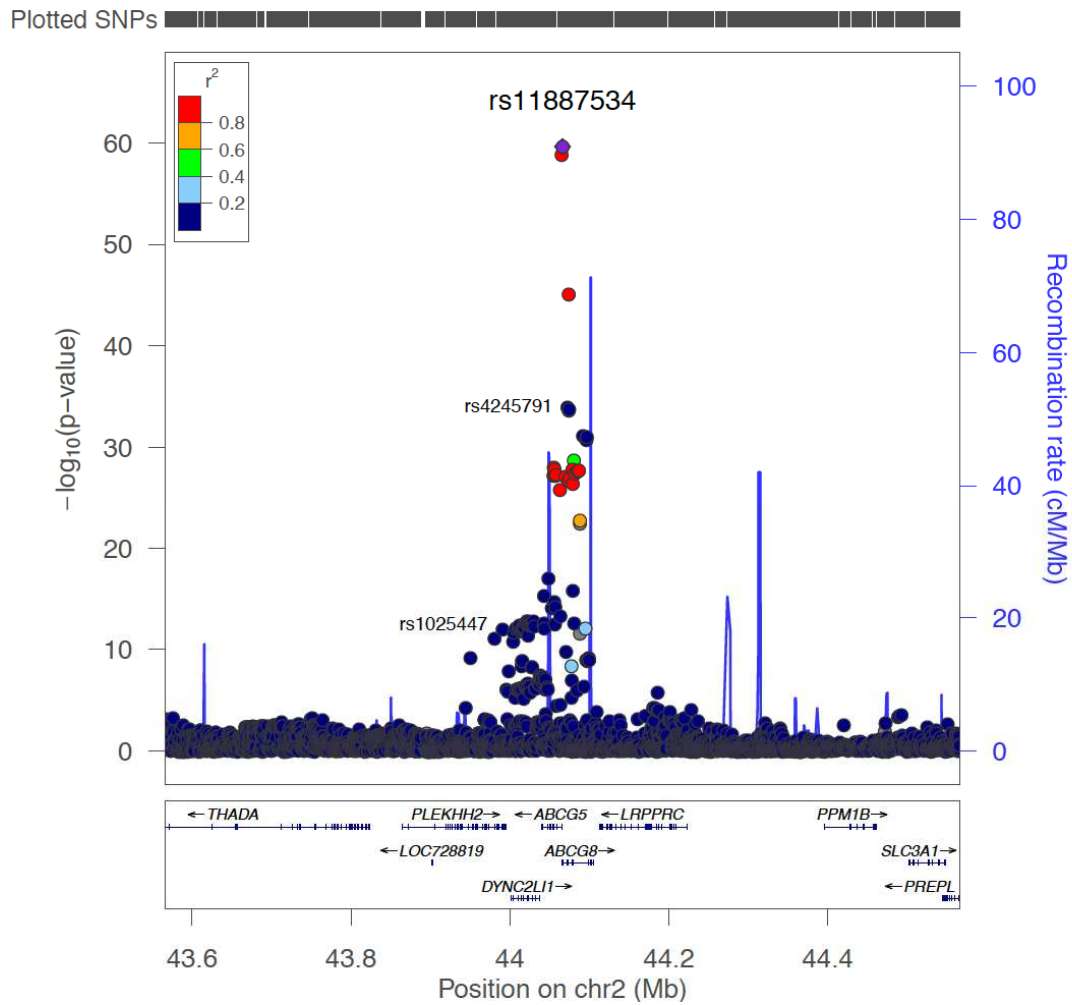

Supplementary Figure 3B – CYP7A1 locus

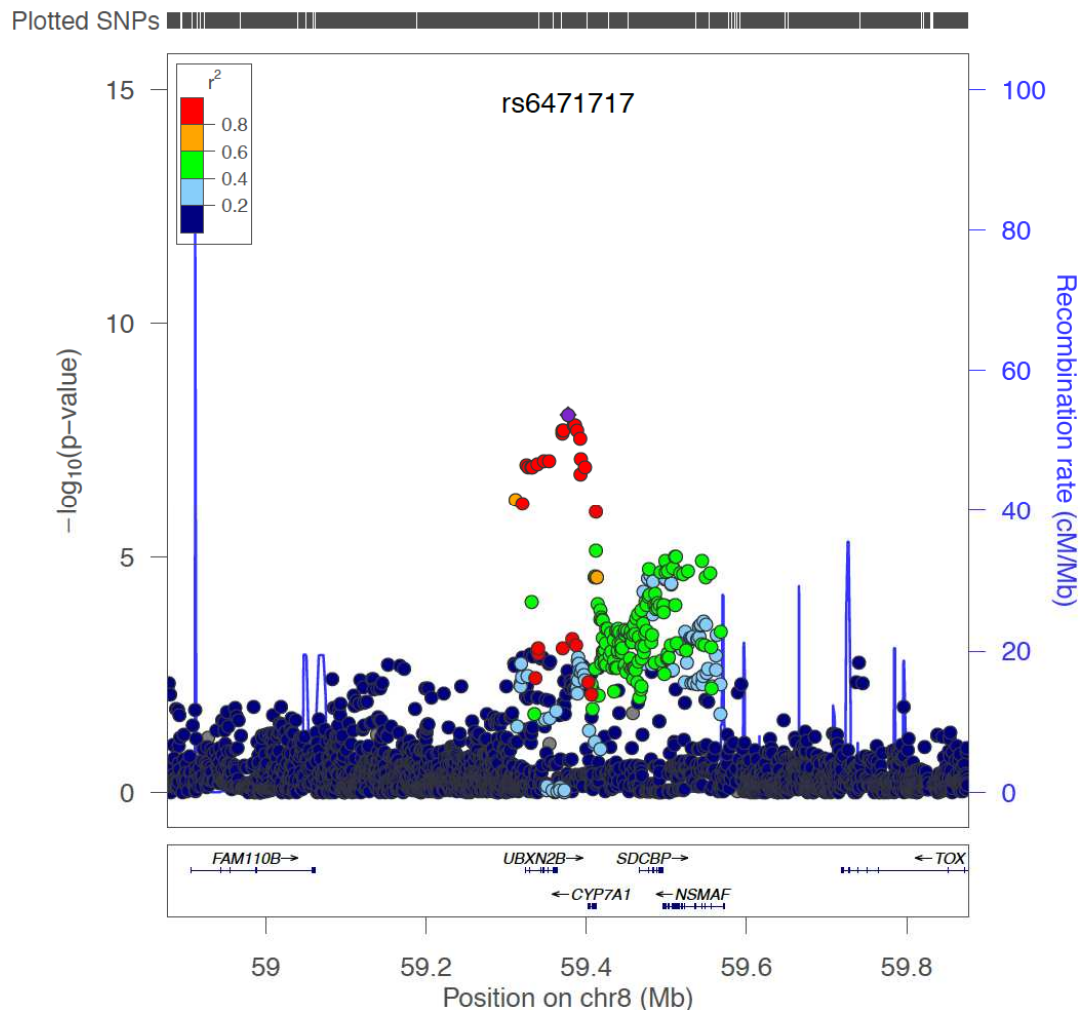

Supplementary Figure 3C – GCKR locus

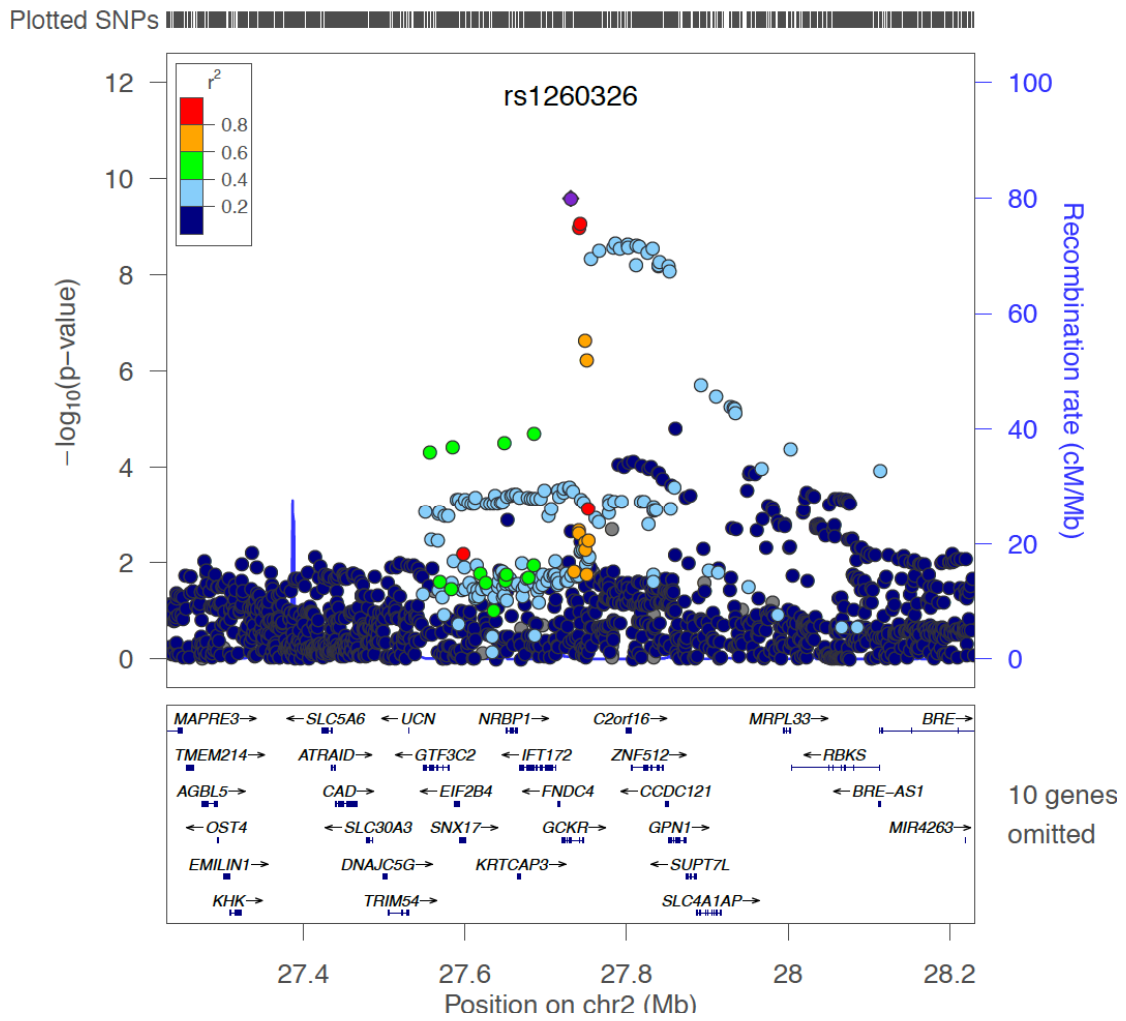

Supplementary Figure 3D – *TM4SF4* locus

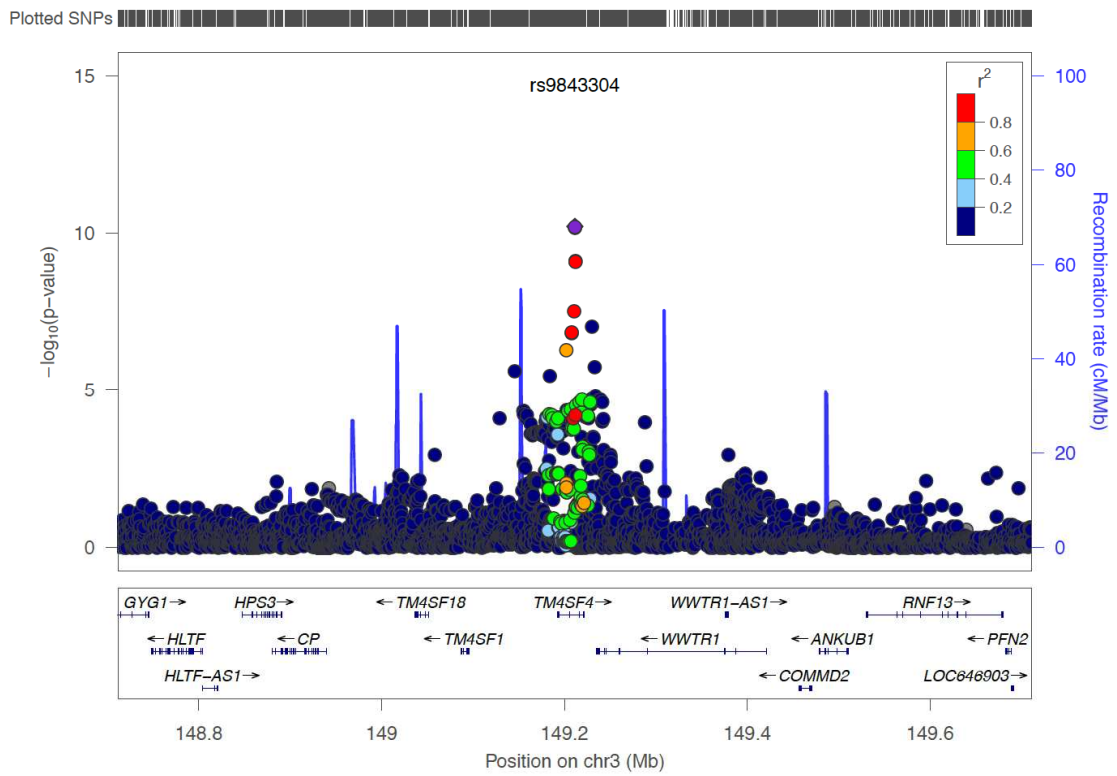

Supplementary Figure 3E – *SULT2A1* locus

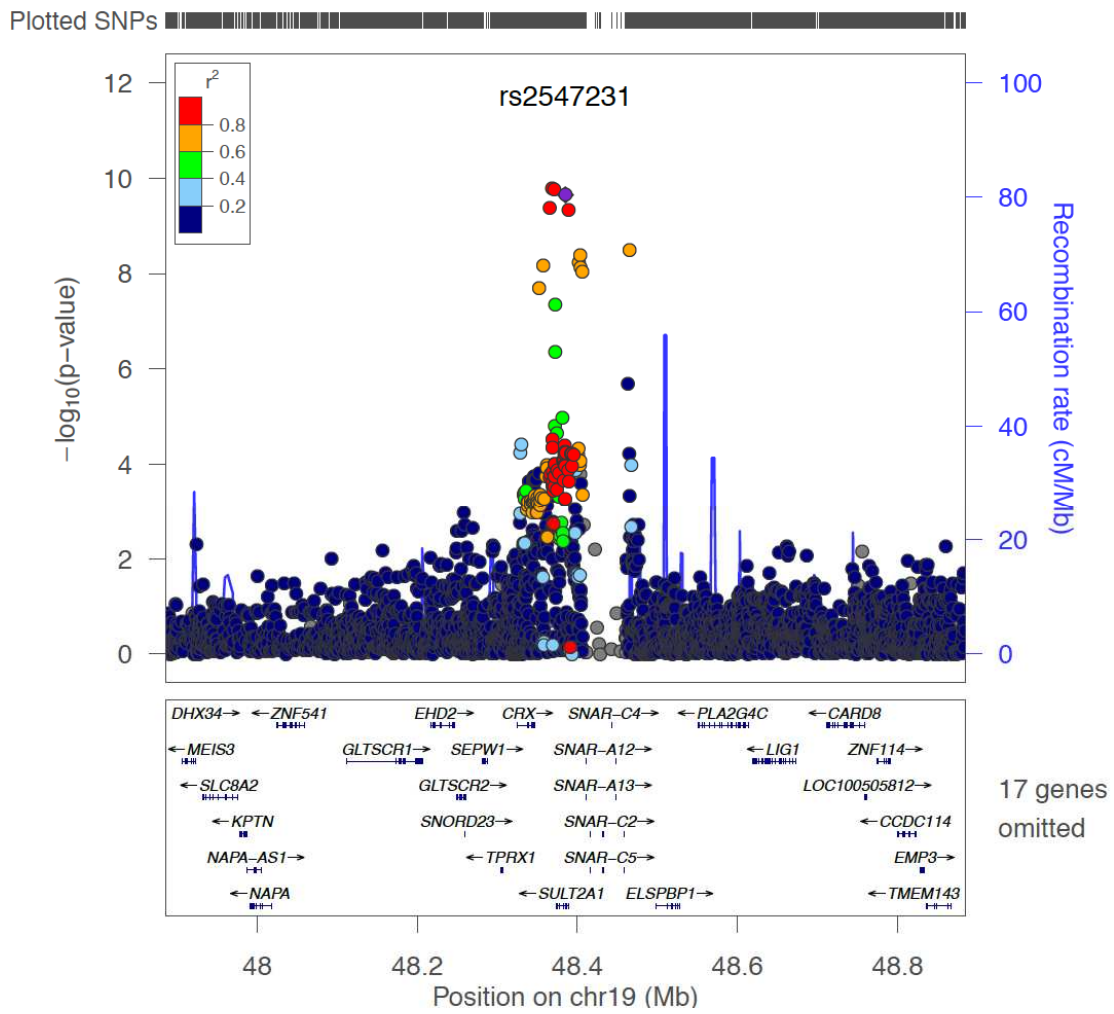

**Supplementary Figure 4. Receiver operator characteristic plots in replication studies.**

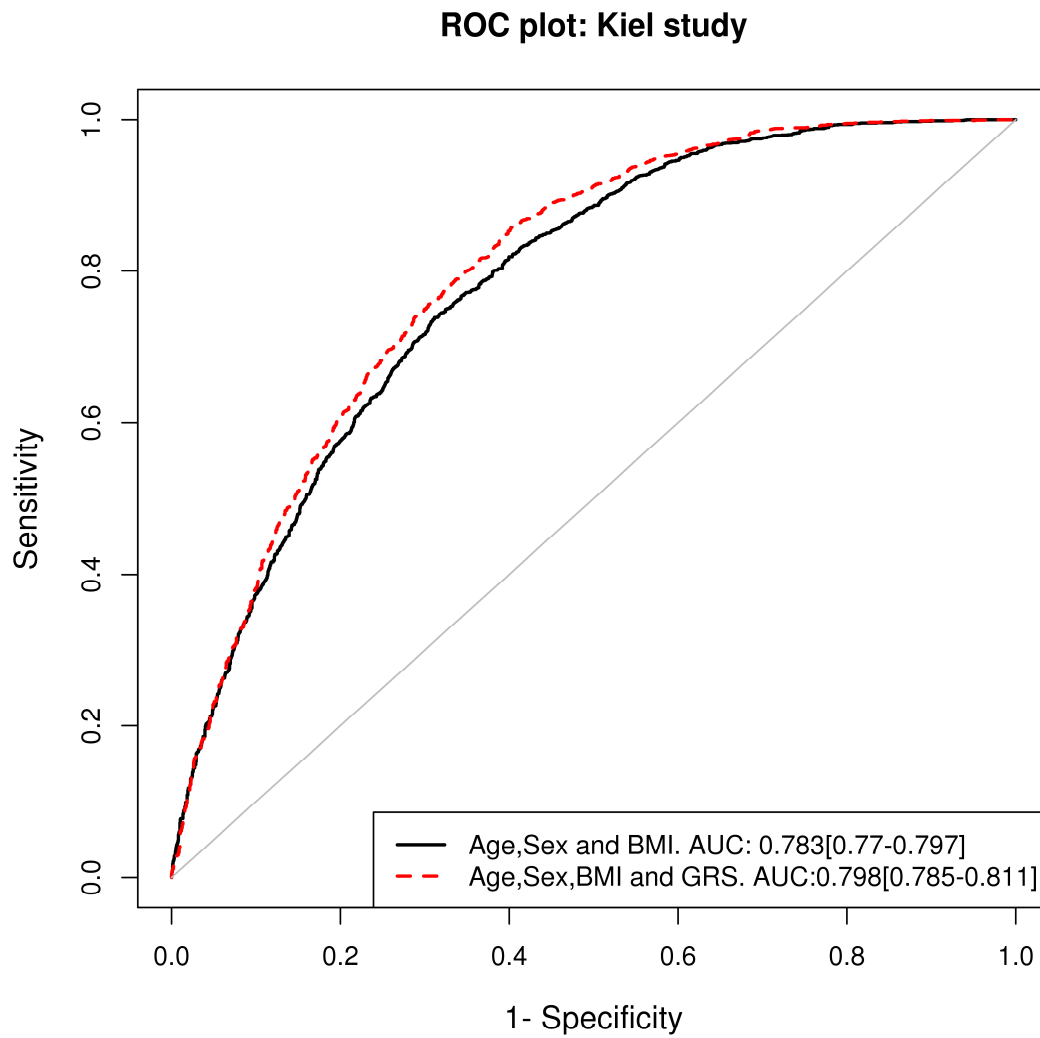

ROC plot: Kiel study, females

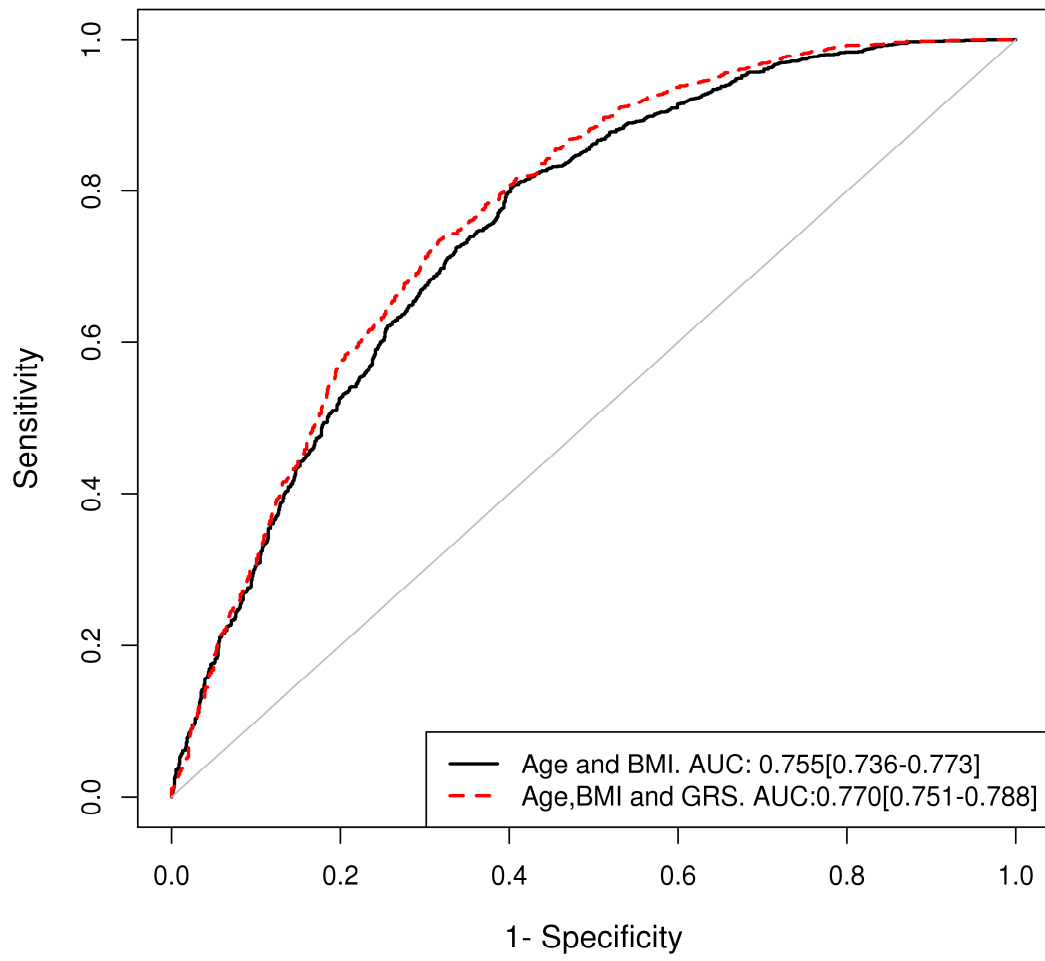



ROC plot: Kiel study, males

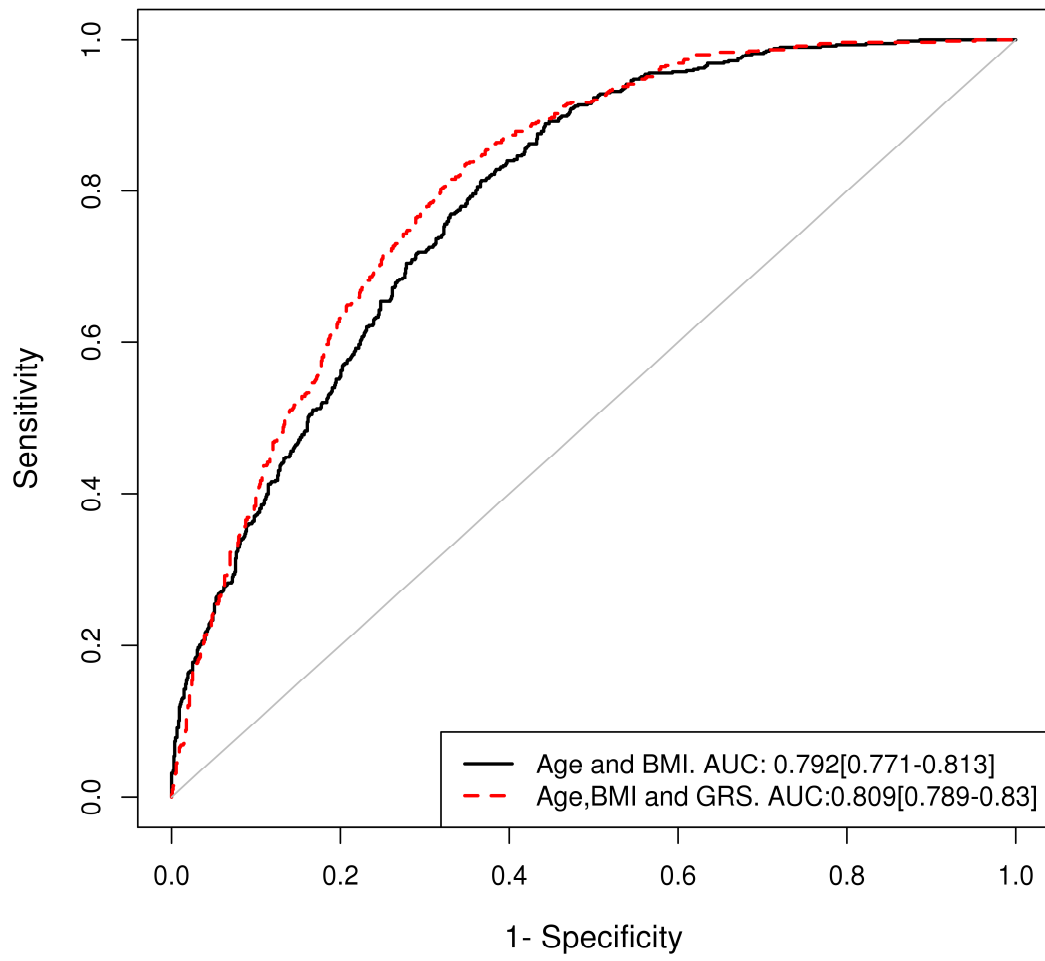

ROC plot : NHS replication study

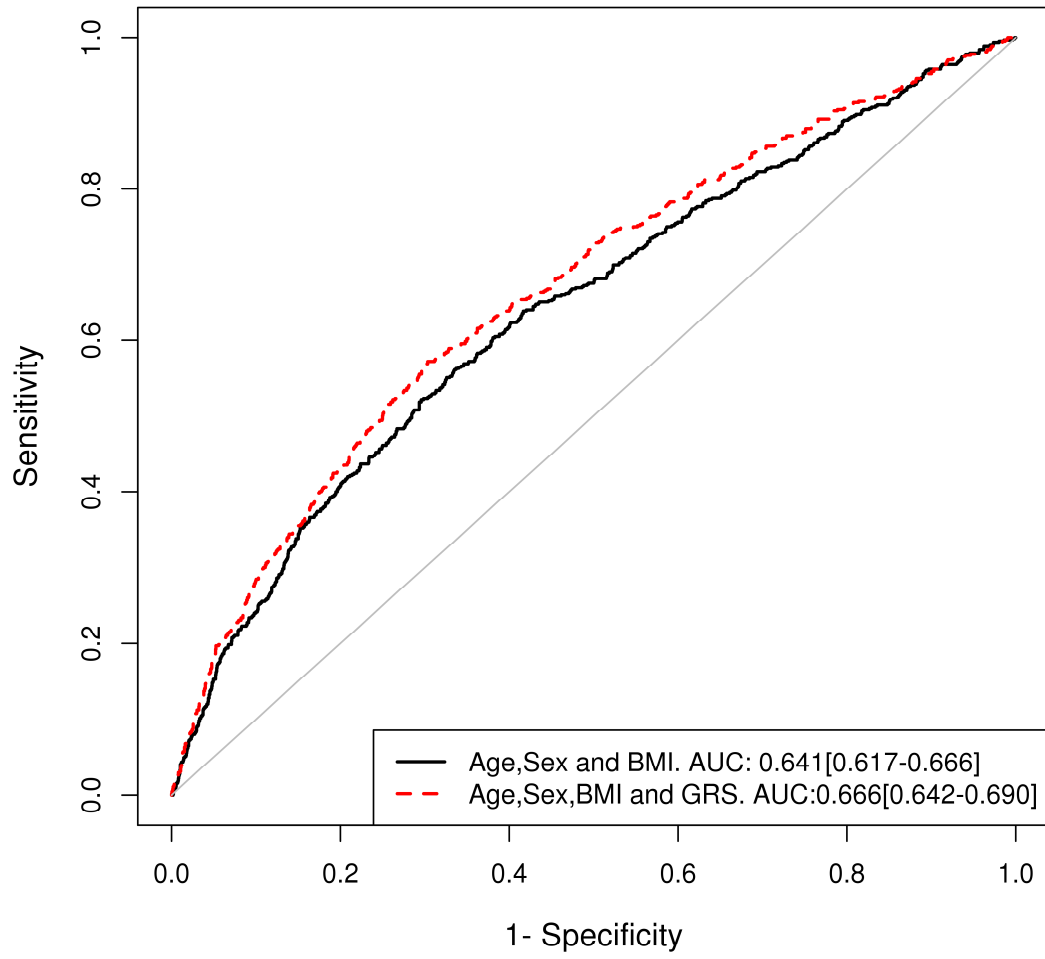

ROC plot : HPFS replication study

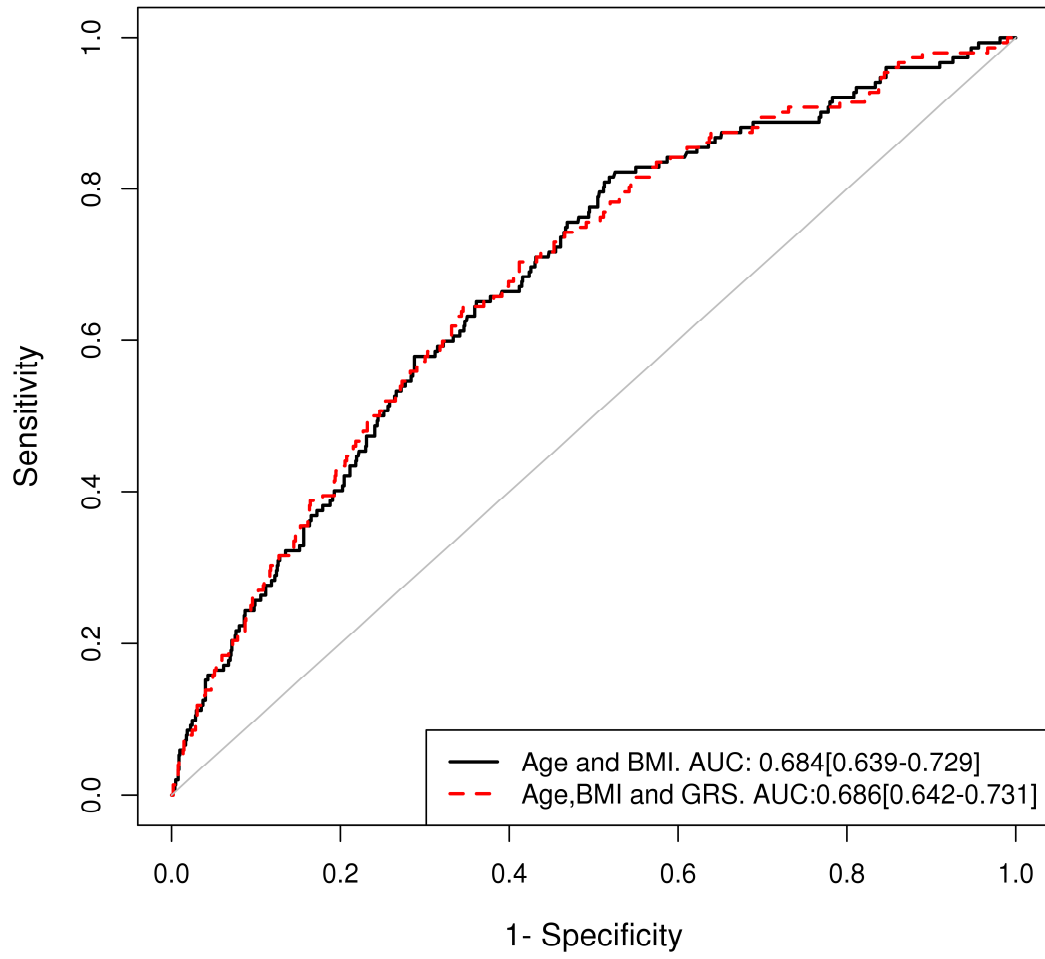

**Supplementary Figure 5. RNA sequencing results from gallbladder and liver from chronic gallstones case and normal gallbladders.**

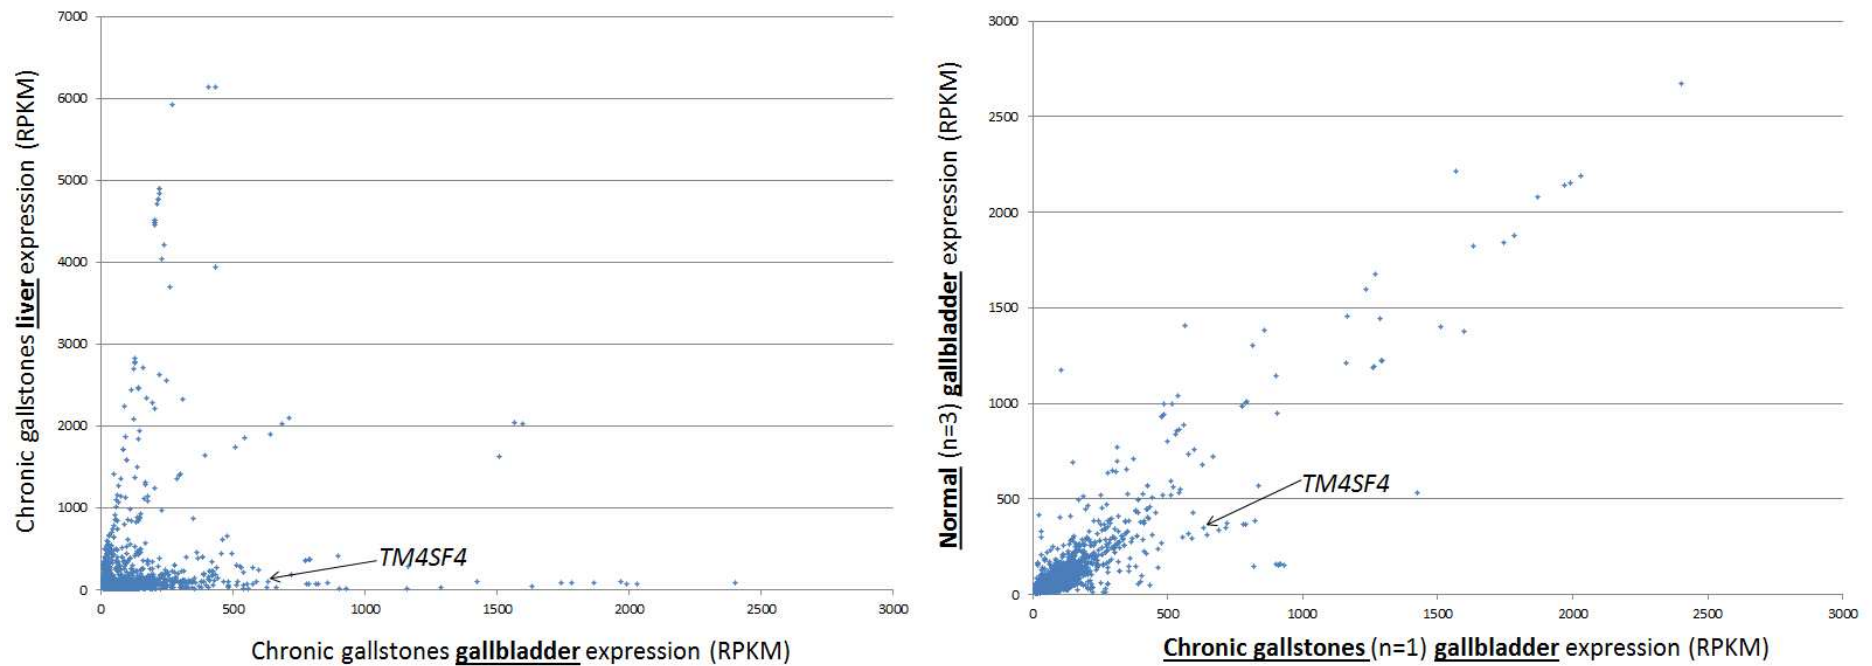

Comparison of RPKM values for expressed genes in chronic gallstone gallbladder versus chronic gallstone liver (left panel) and chronic gallstone gallbladder versus normal (non-gallstones) gallbladder. The point corresponding to *TM4SF4* expression is indicated. The following genes are excluded from the plots due to their high RPKM values: *MTRNR2L8*, *ALB*, and *APOA2*.
